# Supplementary material
Source: PubMed Central journal article supplement (PMC2797276)

## SUPPLEMENTARY EXPERIMENTAL PROCEDURES

*MEK in vitro kinase assays*- Constitutively active MEK-1EE (150 ng/well) and ERK-2K52A (110 ng/well) were incubated in 384 wells black Optiplates (Perkin Elmer) for 1.5 h at room temperature, in the presence of increasing concentrations of inhibitors in a final reaction volume of 50  $\mu$ l. The inhibitors were serially diluted in kinase buffer (9  $\mu$ M ATP, 50 mM Tris-HCl pH 8.0, 10 mM MgCl<sub>2</sub>, 1 mM DTT and 100  $\mu$ M Na<sub>3</sub>VO<sub>4</sub>), to a final concentration of 1% DMSO. At the end of the incubation, the enzyme reaction was quenched by addition of 50  $\mu$ L of assay buffer containing 50 mM Tris-HCl, 50 mM EDTA and 0.1% BSA together with a mixture of 1.25  $\mu$ g/mL europium labeled anti-phosphotyrosine mAb (Perkin Elmer) and 5  $\mu$ g/mL of allophycocyanin labeled anti-GST antibody (CIS-US). Plates were agitated on a plate shaker for 30 minutes and the phosphorylation of the ERK-2K52A substrate was measured by homogeneous time resolved fluorescence (HTRF) at 340 nm excitation and 665 nm (Europium) / 615 nm (APC) emission filters, on a VICTOR V fluorescence plate reader. Phosphorylation is expressed as the ratio of 665 nm signal x 10,000 / 615 nm signal.

*Cell proliferation*- Cell proliferation was assessed by ATP Lite kit. Briefly, various cell densities- 1,500 cells (A375) or 2,000 cells (C26 & MiaPaca-2) were plated in 175 mL opaque white 96-well plates. After an overnight incubation, various MEK inhibitor was added at different concentrations to each duplicate wells and incubated for 4 days, after which the culture medium was removed and replaced with 100  $\mu$ L of PBS. The cells were lysed in 50  $\mu$ L of lysis buffer and incubated at room temperature for 10 minutes, followed by addition of 50  $\mu$ L of substrate buffer. The luminescence from each well was measured using an automated plate reader (Victor, Perkin Elmer, Shelton, CT). For each concentration the mean value  $\pm$  the SD was calculated. The IC<sub>50</sub> values for each compound were calculated using sigmoidal dose response, non-linear regression fit using GraphPad Prism.

## SUPPLEMENTARY FIGURE LEGENDS

**Supplementary Fig. 1.** Neuronal differentiation assessment. (a) Validation of the neuronal differentiation potential of all the stimuli. NS1 cells were incubated for 72 hours with increasing concentrations of PACAP38 (empty triangles, upper graph), IL-6 (full circles, upper graph), NGF (empty circles, upper graph), dbcAMP (full circles, lower graph) and forskolin (empty circles, lower graph). After immunostaining, NOG was quantified as described in material and methods. EC<sub>50</sub> values determined for each stimulus are shown in the graphs. Concentration curves shown in the graphs correspond to a typical experiment done at least in triplicates and performed at least three times with identical results. Right panel shows photomicrographs exemplifying the neuronal phenotype obtained for NS1 cells untreated (a') or treated for 72 h with 100ng/ml of NGF (b'), 15  $\mu$ g/ml of IL-6 (c'), 50  $\mu$ g/ml of bFGF (d'), 50  $\mu$ g/ml of PACAP38 (e'), 40  $\mu$ M of forskolin (f') or 650  $\mu$ M of dbcAMP (g'). Scale bar represents 100  $\mu$ m. (b) qPCR analysis of known markers for neuronal differentiation. Total RNA from the samples used for the microarray experiment were first tested for the expression of marker genes known to be regulated upon NGF-induced neuronal differentiation. Figure shows a heatmap representing fold-change over untreated. Red, green and black represent up-, down- or no-regulation, respectively.

**Supplementary Fig. 2.** Hierarchical cluster analysis. Heatmap of the most variable genes for each treatment and time-point, showing the clustering of the stimuli in two main categories (log<sub>2</sub> of fold-changes, in respect to time-matched untreated samples). Red indicates up-regulation, green

indicates down-regulation and black indicates no changes in expression. Individual genes and their clustering are represented vertically while clustering of treatments, time-points and biological replicates are represented horizontally. Roman numbers beside the treatments refer to biological replicates.

Supplementary table I. Genes differentially regulated during neuronal differentiation. Table lists genes identified by microarray analysis to be up- or down-regulated in at least one time-point, with an absolute log<sub>2</sub> fold-change > 1 (for bFGF absolute log<sub>2</sub> fold-change > 0.76) and a FDR value < 0.05. At the top, genes regulated in common by all stimuli (as in Table I), followed by genes regulated by cAMP, forskolin and PACAP38 only, and finally genes regulated by NGF, bFGF and IL-6 only.

Supplementary Fig. 3. Characterization of AS-702789. (a) In vitro inhibition of MEK1 kinase activity. Constitutively active MEK-EE (150 ng/well) was incubated for 1.5 hours with kinase-inactive ERK-2-K52A (110 ng/well), in the presence of increasing concentrations of AS-702789, as indicated. The reaction was stopped by addition of 50 mM Tris-HCL, 50 mM EDTA and 0.1% BSA. ERK-2-K52A phosphorylation was detected by homogeneous time resolved fluorescence (340 nm excitation, 665 nm (Europium)/615 (APC) emission) upon addition of Europium-labeled anti-phosphotyrosine antibodies, as described in material and methods. **(b-d) Inhibition of tumor cell proliferation.** Cells plated in 96 cell plates were cultured at 37°C and 5%CO<sub>2</sub> in growth media containing 10% FBS, in the presence of increasing concentrations of AS-702789, for 4 days. Cell proliferation was quantified using the ATPlite cell proliferation kit as described in material and methods (b) Murine Colon C26 cells, (c) Human melanoma A375 cells, (d) Human pancreatic MiaPaCa2 cells. IC<sub>50</sub> values are shown in the graphs.

## Supplementary Figure 1a

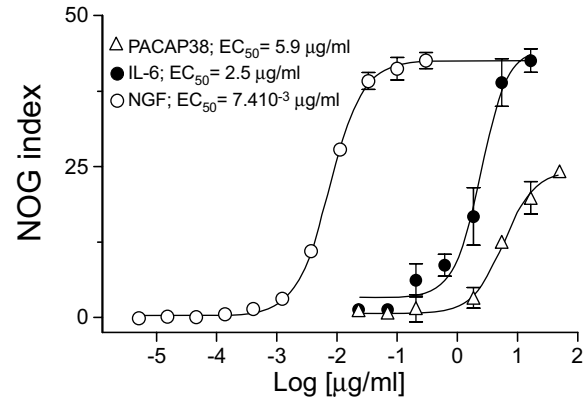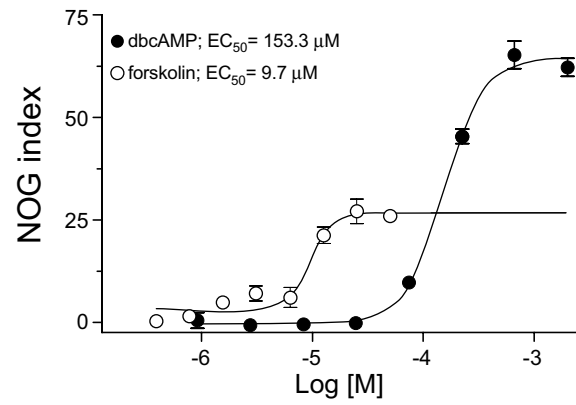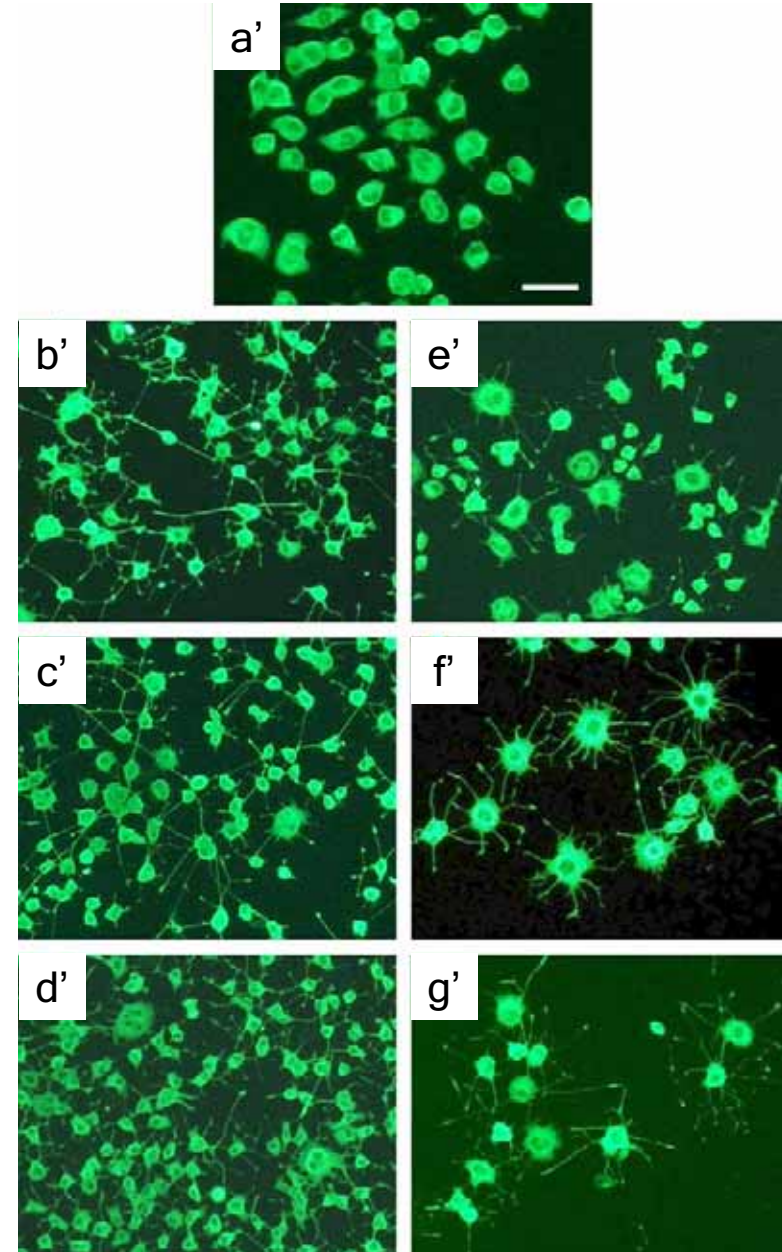

## Supplementary Figure 1b

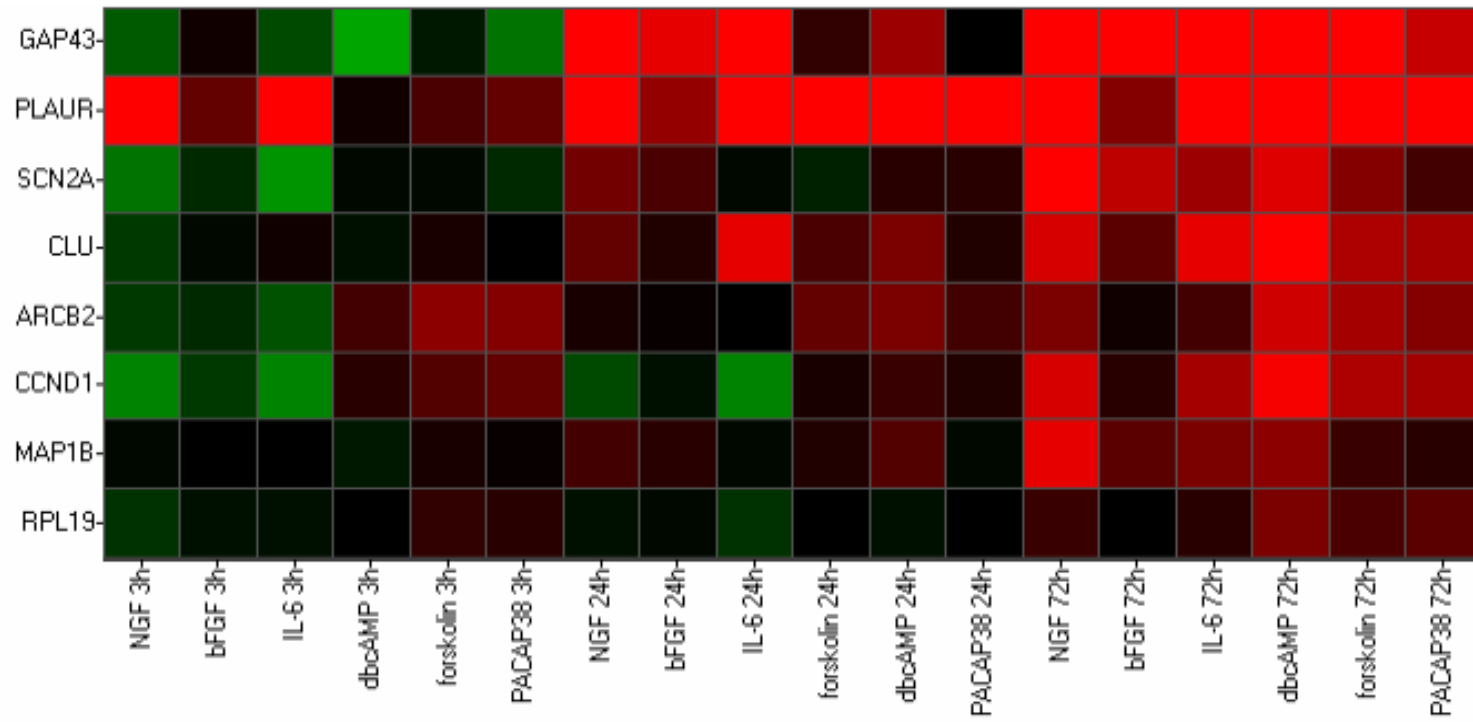

# Supplementary Figure 2

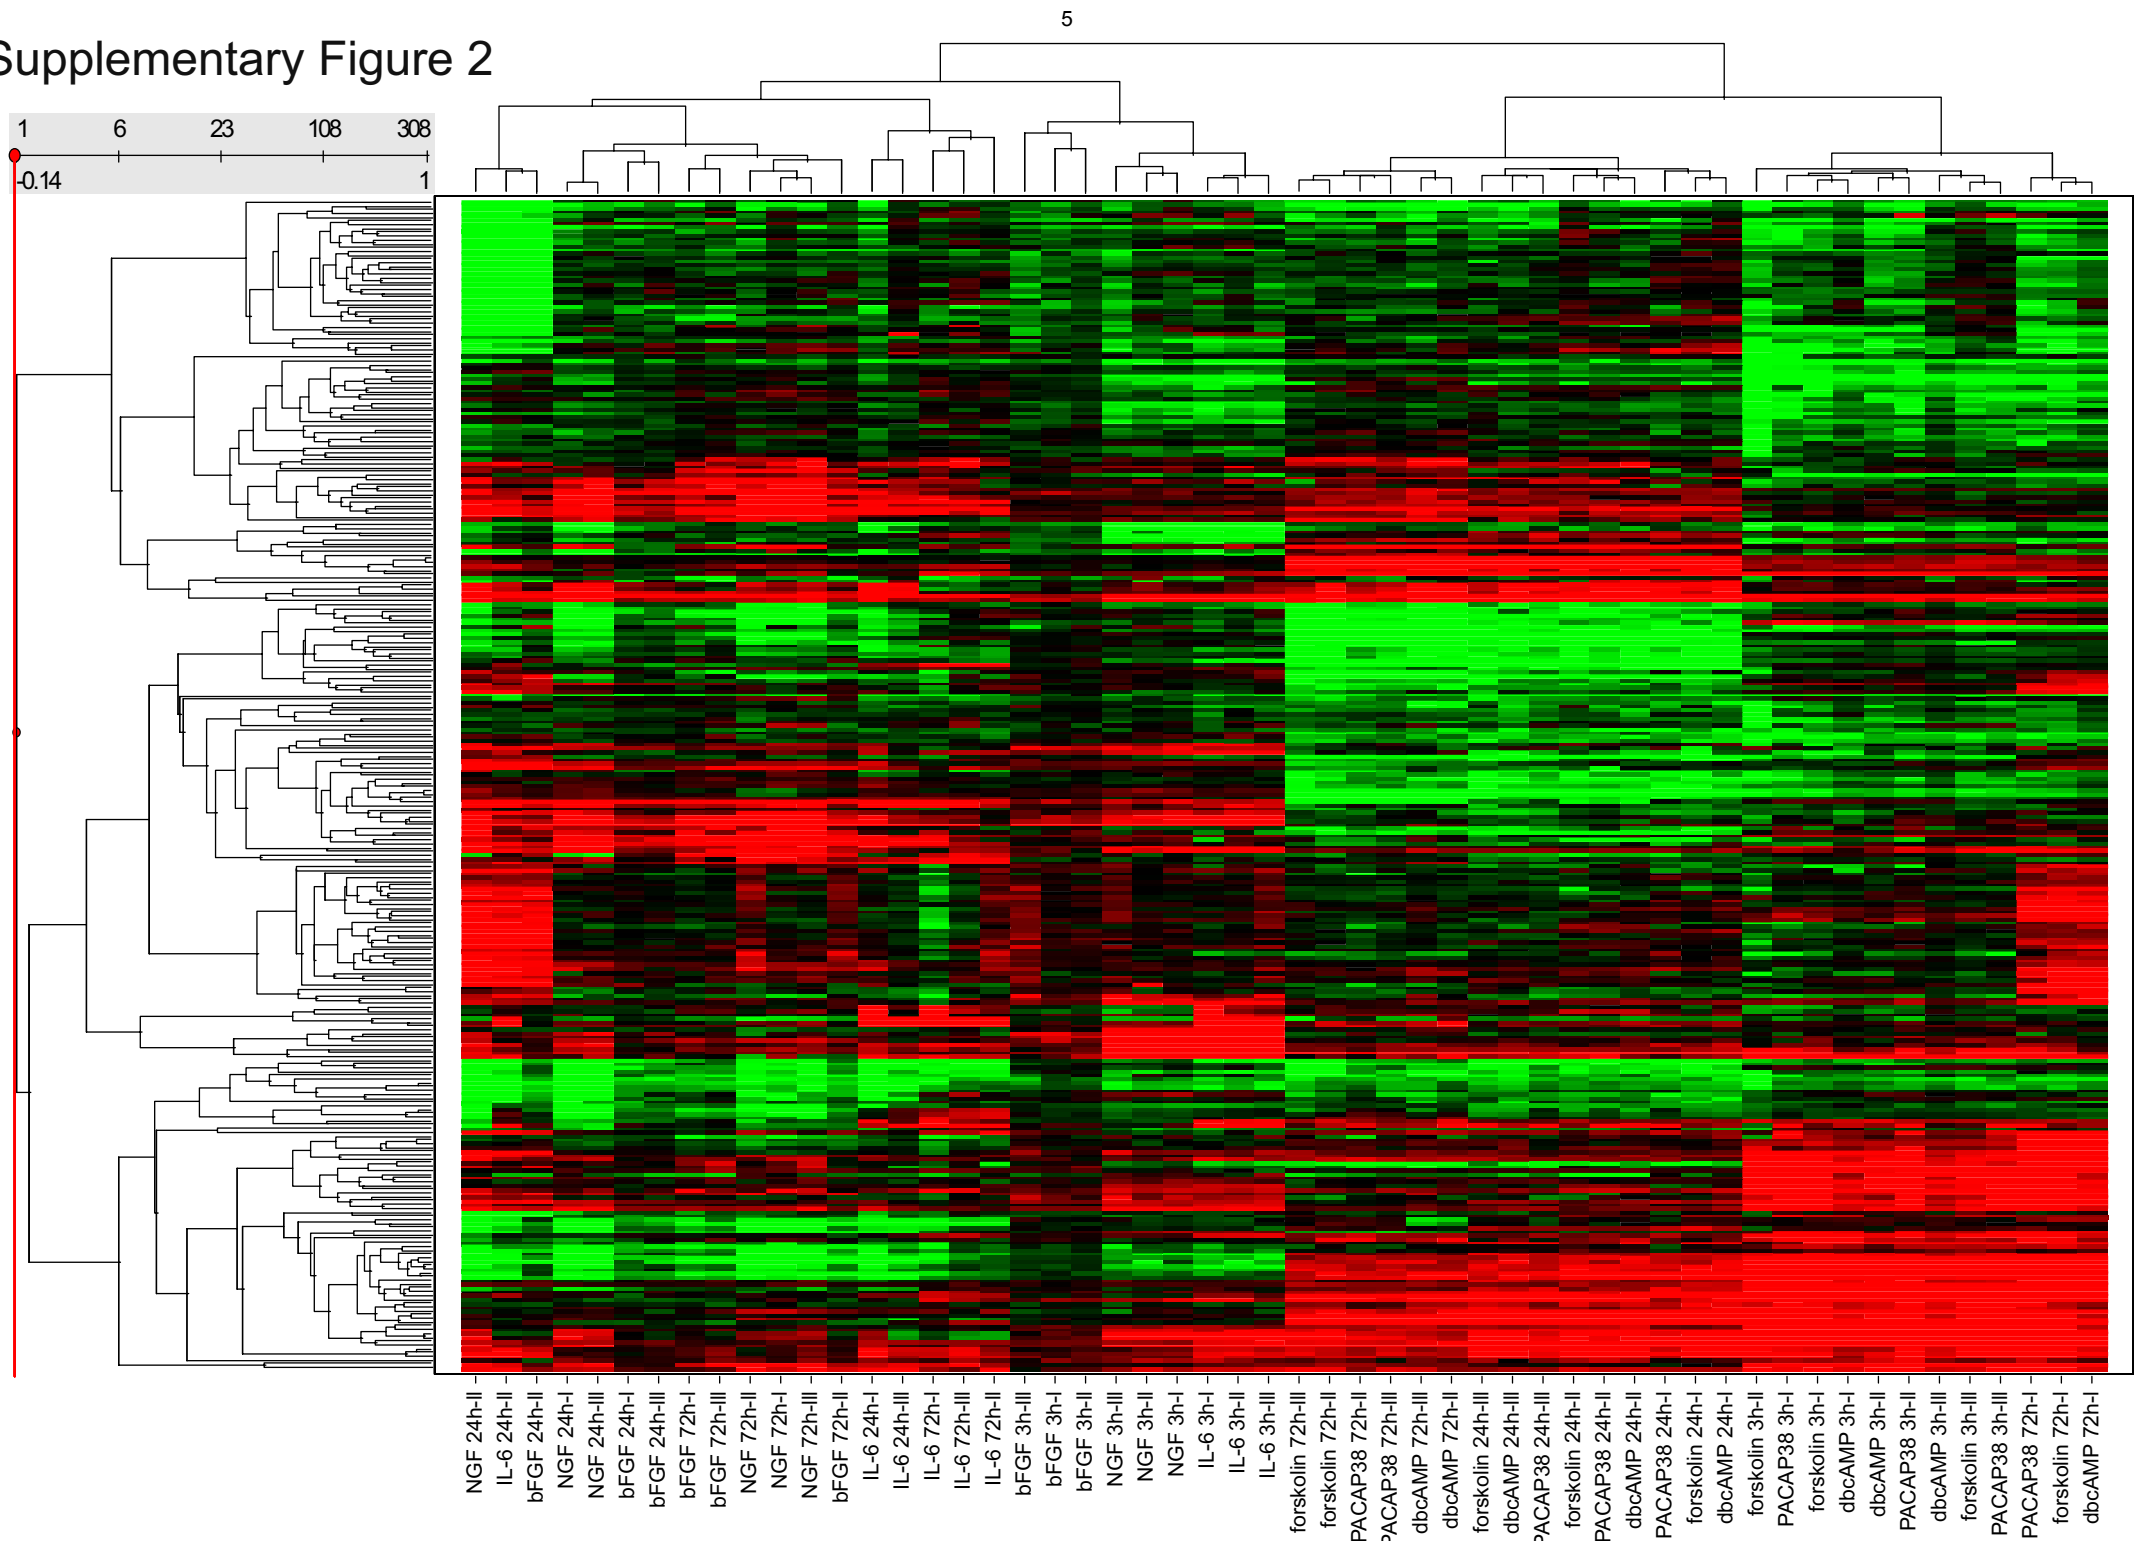

## Supplementary Table 1

| PROBESET ID  | GENE                  | REFSEQ                                 | STIMULI     | dbcAMP |       |       | forskolin |       |       | PACAP38 |       |       | NGF   |       |       | bFGF  |       |       | IL-6  |       |       |
|--------------|-----------------------|----------------------------------------|-------------|--------|-------|-------|-----------|-------|-------|---------|-------|-------|-------|-------|-------|-------|-------|-------|-------|-------|-------|
|              |                       |                                        |             | 3h     | 24h   | 72h   | 3h        | 24h   | 72h   | 3h      | 24h   | 72h   | 3h    | 24h   | 72h   | 3h    | 24h   | 72h   | 3h    | 24h   | 72h   |
| 1368092_at   | Fah                   | NM_017181.2                            | All stimuli | 0.30   | 1.06  | -0.05 | 0.13      | 1.58  | 0.45  | 0.63    | 1.12  | 0.47  | -0.31 | 3.30  | -3.23 | -0.14 | -0.11 | -1.06 | -0.53 | -1.58 | -0.98 |
| 1368106_at   | Plk2                  | NM_031821.1                            | All stimuli | 3.21   | 4.78  | 3.79  | 3.51      | 4.40  | 3.87  | 3.60    | 4.32  | 3.46  | 2.71  | 4.19  | 3.33  | 1.17  | 1.99  | 2.20  | 2.85  | 3.37  | 2.58  |
| 1368174_at   | Egln3                 | NM_019371.1                            | All stimuli | 1.79   | -0.23 | -0.05 | 1.93      | -0.36 | -0.07 | 2.94    | -0.32 | -0.04 | 0.94  | -3.88 | -3.89 | -0.18 | -1.32 | -1.71 | 0.66  | -2.56 | -0.35 |
| 1368321_at   | Egr1                  | NM_012551.1                            | All stimuli | 6.33   | 2.13  | 4.34  | 6.02      | 1.09  | 3.29  | 5.99    | 1.36  | 3.76  | 9.30  | 6.61  | 4.46  | 5.83  | 3.27  | 2.18  | 9.26  | 1.72  | 1.83  |
| 1368451_at   | Hrh3                  | NM_053506.1                            | All stimuli | -1.72  | -0.87 | -1.22 | -2.49     | -1.06 | -1.06 | -2.92   | -0.92 | -0.90 | -2.12 | -1.93 | -0.52 | -0.66 | -0.66 | -0.30 | -2.53 | -1.42 | -0.74 |
| 1368489_at   | Fosl1;RGD1565319      | NM_012953.1;XM_001070153.1;XM_024356.1 | All stimuli | 1.65   | 3.01  | 2.05  | 1.92      | 2.73  | 2.04  | 2.12    | 2.78  | 1.86  | 2.75  | 2.84  | 1.65  | 1.41  | 1.25  | 1.36  | 2.83  | 1.54  | 1.17  |
| 1368503_at   | Gch                   | NM_024356.1                            | All stimuli | 1.99   | 1.23  | 1.23  | 2.41      | 0.92  | 1.06  | 2.49    | 1.09  | 1.13  | 1.50  | 1.62  | 0.29  | 0.97  | 0.94  | 0.69  | 1.49  | 0.54  | 0.15  |
| 1368641_at   | Wnt4                  | NM_053402.1                            | All stimuli | 0.83   | -1.54 | -2.00 | 0.91      | -1.12 | -1.95 | 2.73    | -0.60 | -0.98 | 0.57  | -1.69 | -3.21 | -0.07 | -1.48 | -2.59 | 0.05  | -1.71 | -1.76 |
| 1369428_a_at | Htr3a                 | NM_024394.2                            | All stimuli | 0.24   | -1.40 | -0.02 | -0.11     | -1.50 | -0.49 | -0.14   | -1.69 | 0.13  | -0.19 | -1.86 | 2.63  | 0.16  | 0.71  | 2.13  | -0.52 | -0.15 | 1.72  |
| 1369643_a_at | Lphn2                 | NM_134408.1                            | All stimuli | 2.00   | -1.85 | -0.50 | 2.48      | -1.51 | -0.36 | 2.76    | -2.10 | -0.36 | -0.09 | -2.19 | -1.59 | 0.18  | -1.63 | -0.45 | -0.51 | -1.88 | -0.26 |
| 1370177_at   | PVR                   | NM_017076.1                            | All stimuli | 1.57   | 2.27  | 2.24  | 2.36      | 2.19  | 2.36  | 2.85    | 2.06  | 2.27  | 2.92  | 1.66  | 0.95  | 0.96  | 0.39  | 0.51  | 3.45  | 0.94  | 0.39  |
| 1370408_at   | Nid67                 | NM_173126.2                            | All stimuli | 2.00   | 1.13  | 1.06  | 2.55      | 0.77  | 1.16  | 2.96    | 1.07  | 1.26  | 2.12  | 2.31  | 1.62  | 0.95  | 1.02  | 1.09  | 2.09  | 1.26  | 0.64  |
| 1370923_at   | Bambi                 | NM_139082.2                            | All stimuli | 3.98   | 1.98  | 1.44  | 3.44      | 1.34  | 1.69  | 4.18    | 1.69  | 2.04  | -0.39 | -1.85 | -0.95 | -0.01 | -0.81 | -0.45 | 0.13  | -1.33 | 0.35  |
| 1370928_at   | Akr1b8                | NM_137136.1                            | All stimuli | 0.26   | 2.61  | 2.38  | 0.35      | 1.96  | 1.72  | 0.29    | 2.40  | 1.97  | 0.64  | 3.42  | 3.69  | 0.18  | 1.17  | 2.49  | 0.71  | 2.57  | 2.30  |
| 1370989_at   | Ret                   | NM_012643.1                            | All stimuli | 1.01   | -1.31 | -2.12 | 0.48      | -1.42 | -2.19 | 1.08    | -0.59 | -1.28 | 1.96  | 4.26  | 3.33  | 1.53  | 2.72  | 2.44  | 1.52  | 2.62  | 2.56  |
| 1371883_at   | Mmd                   | NM_001007673.1;XM_001081244.1          | All stimuli | 1.15   | 0.45  | 0.57  | 1.66      | 0.22  | 0.57  | 2.20    | 0.47  | 0.83  | 1.99  | 2.68  | 2.03  | 0.68  | 1.02  | 1.30  | 2.48  | 1.52  | 1.12  |
| 1372158_at   | Lrp16                 | NM_139337.1                            | All stimuli | -0.01  | -1.40 | -0.47 | -0.14     | -1.01 | -0.24 | 0.15    | -1.06 | -0.03 | -0.07 | -2.88 | -1.74 | 0.10  | -0.92 | -0.37 | -0.01 | -2.01 | -0.07 |
| 1372736_at   | Agl; predicted        | XM_001073642.1;XM_342331.3             | All stimuli | 2.15   | 2.27  | 2.17  | 2.32      | 1.96  | 1.82  | 2.39    | 1.95  | 1.95  | -0.64 | -2.15 | -1.86 | -0.30 | -1.02 | -1.38 | -0.58 | -2.27 | -0.87 |
| 1373093_at   | Errf1                 | NM_001014071.1                         | All stimuli | 1.22   | 0.53  | 0.55  | 1.72      | 0.38  | 0.54  | 2.16    | 0.73  | 0.61  | 2.77  | 0.92  | -0.07 | 0.98  | 0.08  | 0.10  | 2.83  | 0.27  | -0.01 |
| 1373497_at   |                       |                                        | All stimuli | -0.88  | -1.41 | -1.27 | -1.14     | -1.33 | -1.06 | -0.90   | -1.25 | -1.23 | -0.38 | -1.42 | -1.66 | -0.35 | -0.63 | -1.27 | -0.41 | -1.20 | -1.40 |
| 1373590_at   | Stom                  | NM_001037583.1                         | All stimuli | 0.64   | 1.51  | 1.53  | 0.64      | 1.19  | 1.14  | 0.63    | 1.19  | 1.15  | 0.74  | 2.36  | 2.95  | 0.42  | 1.52  | 2.30  | 0.80  | 1.26  | 0.89  |
| 1374246_at   |                       |                                        | All stimuli | -0.90  | -1.49 | -1.05 | -1.64     | -1.51 | -1.25 | -1.22   | -1.03 | -1.24 | -1.66 | -4.82 | -2.16 | -0.82 | -1.40 | -1.69 | -1.53 | -3.94 | -1.25 |
| 1374325_at   |                       |                                        | All stimuli | 0.22   | 2.58  | 1.81  | 0.19      | 1.74  | 1.56  | 0.25    | 2.01  | 1.33  | 0.69  | 3.00  | 1.70  | 0.22  | 1.56  | 1.53  | 0.82  | 2.57  | 0.23  |
| 1374817_at   |                       |                                        | All stimuli | -1.72  | -2.57 | -1.79 | -2.62     | -2.99 | -2.68 | -1.94   | -2.36 | -2.00 | -1.04 | -2.56 | -2.09 | -0.40 | -1.78 | -0.84 | -2.93 | -2.79 | -2.26 |
| 1375729_at   | RGD1560587; predicted | XM_244196.4;XR_007714.1                | All stimuli | -1.25  | -1.64 | -1.16 | -1.86     | -1.86 | -1.72 | -1.58   | -1.52 | -1.23 | 0.26  | -1.54 | -1.51 | -0.17 | -0.54 | -1.04 | 0.12  | -1.44 | -1.26 |
| 1376648_at   | Mlyn                  | NM_139082.2                            | All stimuli | -1.48  | -1.43 | -0.72 | -1.25     | -1.65 | -1.59 | -1.49   | -2.00 | -0.91 | -0.07 | 1.02  | 1.68  | 0.12  | 0.58  | 1.51  | -1.45 | 0.30  | 0.27  |
| 1377064_at   | Dusp6                 | NM_053883.2                            | All stimuli | 1.32   | 1.03  | 0.57  | 1.16      | 1.13  | 0.99  | 1.53    | 1.01  | 0.76  | 5.15  | 6.88  | 6.23  | 2.92  | 4.39  | 4.81  | 4.61  | 2.90  | 0.30  |
| 1378045_at   | C1q1; predicted       | XM_001081530.1;XM_343971.3             | All stimuli | -1.00  | -1.36 | 0.22  | -1.21     | -1.71 | -0.58 | -1.26   | -1.79 | -0.74 | 0.97  | 2.81  | 3.30  | 0.52  | 1.64  | 2.35  | 0.02  | 2.16  | 0.91  |
| 1378160_at   | Sdfr2                 | XM_001073918.1                         | All stimuli | 3.61   | 1.79  | 2.09  | 3.70      | 1.44  | 2.05  | 3.69    | 1.59  | 2.11  | -1.23 | -4.30 | -4.16 | -0.49 | -1.39 | -2.31 | -1.73 | -3.96 | -1.30 |
| 1378453_at   |                       |                                        | All stimuli | 0.04   | 2.63  | 1.54  | 0.10      | 1.61  | 1.00  | 0.15    | 1.88  | 0.72  | 0.79  | 3.31  | 1.51  | -0.01 | 1.46  | 0.45  | 0.83  | 2.70  | -0.52 |
| 1379404_at   |                       |                                        | All stimuli | -1.21  | -0.42 | -1.00 | -1.08     | -0.56 | -1.41 | -1.19   | -0.53 | -0.93 | -1.65 | -1.12 | -0.89 | -1.09 | -0.77 | -0.73 | -1.65 | -0.58 | -0.54 |
| 1379805_at   | Slc41a2; predicted    | XM_001079703.1;XM_343191.3             | All stimuli | 1.25   | 1.38  | 1.48  | 1.65      | 1.07  | 1.34  | 2.34    | 1.28  | 1.33  | 1.72  | 2.13  | 2.32  | 0.20  | 0.50  | 1.55  | 2.26  | 0.65  | 0.77  |
| 1379867_at   |                       |                                        | All stimuli | 0.27   | -1.04 | -0.37 | -0.43     | -1.32 | -1.20 | 0.05    | -1.52 | -0.55 | 0.13  | -2.08 | -0.90 | -0.59 | -1.14 | -1.09 | 1.06  | -1.14 | -1.30 |
| 1380168_at   |                       |                                        | All stimuli | 0.07   | 1.87  | 0.64  | 0.12      | 1.72  | 0.67  | 0.48    | 1.79  | 0.52  | 1.10  | 1.95  | 1.41  | 0.54  | 1.97  | 0.86  | 1.00  | 1.30  | -0.28 |
| 1380229_at   |                       |                                        | All stimuli | 1.35   | 2.53  | 1.20  | 1.25      | 2.18  | 0.99  | 1.56    | 2.29  | 1.12  | 1.68  | 1.67  | 0.57  | 1.31  | 1.67  | 0.83  | 1.62  | 1.55  | 0.49  |
| 1380404_at   |                       |                                        | All stimuli | 3.39   | 2.09  | 2.29  | 3.27      | 1.55  | 2.28  | 3.31    | 1.44  | 2.44  | -1.30 | -3.22 | -2.58 | -0.48 | -1.55 | -2.24 | -1.77 | -2.89 | -1.07 |
| 1382375_at   |                       |                                        | All stimuli | -1.35  | -3.43 | -1.09 | -1.26     | -3.37 | -2.22 | -1.19   | -2.44 | -1.20 | -0.81 | -2.82 | -2.36 | -0.28 | -2.09 | -0.97 | -2.36 | -3.16 | -2.96 |
| 1382442_at   | LOC682750             | XM_001062917.1                         | All stimuli | 0.75   | 1.87  | 0.96  | 0.48      | 1.29  | 0.68  | 0.88    | 1.58  | 0.92  | 0.77  | 4.88  | 4.88  | 0.41  | 1.10  | 2.98  | 0.98  | 3.55  | 2.22  |
| 1383552_at   |                       |                                        | All stimuli | -1.35  | -0.93 | -0.72 | -1.25     | -0.85 | -0.58 | -1.44   | -0.67 | -1.28 | -1.03 | 1.08  | 1.04  | 1.05  | -0.70 | 1.51  | -1.41 | 1.21  | -1.12 |
| 1386739_at   | Etv4; predicted       | XM_001081496.1;XM_340910.3             | All stimuli | 0.24   | 1.84  | 1.01  | 0.13      | 1.83  | 0.99  | 0.03    | 1.81  | 1.06  | 0.92  | 2.57  | 2.14  | 0.44  | 2.11  | 2.00  | 0.64  | 2.07  | 0.44  |
| 1387024_at   | Dusp6                 | NM_053883.2                            | All stimuli | 1.04   | 1.12  | 0.42  | 1.21      | 0.54  | 0.77  | 1.78    | 0.76  | 0.67  | 4.75  | 6.49  | 5.47  | 2.74  | 4.10  | 3.88  | 4.24  | 2.66  | 0.07  |
| 1387144_at   | Iitga1                | NM_030994.2                            | All stimuli | 0.12   | 2.77  | 2.40  | 0.14      | 1.60  | 1.75  | 0.21    | 2.04  | 1.33  | 0.90  | 3.35  | 1.15  | -0.26 | 1.17  | -0.10 | 0.87  | 2.59  | -0.99 |
| 1387184_at   | Axin2                 | NM_024356.1                            | All stimuli | -1.73  | -1.92 | -1.60 | -2.04     | -1.42 | -1.66 | -1.61   | -1.74 | -1.63 | -0.87 | -2.41 | -2.22 | -0.90 | -1.35 | -1.43 | -1.26 | -1.81 | -1.93 |
| 1387219_at   | Adm                   | NM_012715.1                            | All stimuli | -0.59  | -1.04 | -1.28 | -0.50     | -1.56 | -1.53 | 0.12    | -1.28 | -0.81 | 0.03  | -1.93 | -2.37 | -0.24 | -0.88 | -1.23 | -0.02 | -1.35 | 0.11  |
| 1387221_at   | Gch                   | NM_024356.1                            | All stimuli | 1.43   | 1.00  | 0.75  | 1.70      | 0.71  | 0.84  | 1.78    | 0.88  | 0.72  | 1.09  | 1.23  | 0.27  | 0.60  | 0.82  | 0.50  | 1.09  | 0.38  | 0.08  |
| 1388080_a_at | Hrh3                  | NM_053506.1                            | All stimuli | -1.38  | -0.79 | -0.81 | -2.04     | -0.89 | -0.88 | -1.85   | -0.89 | -0.69 | -2.30 | -1.87 | -0.78 | -1.04 | -0.87 | -0.53 | -2.74 | -1.93 | -1.02 |
| 1389112_at   | Nkd1; predicted       | XM_001066780.1;XM_344728.3             | All stimuli | 0.11   | -1.13 | -0.40 | 0.19      | -1.08 | -0.51 | 0.25    | -1.15 | -0.56 | -0.13 | -1.28 | -0.65 | -0.12 | -0.97 | -0.31 | -0.20 | -1.11 | -0.56 |
| 1389353_at   | Sema6d; predicted     | XM_001077367.1;XM_230583.4             | All stimuli | -1.28  | -2.44 | -2.13 | -1.35     | -2.52 | -2.01 | -1.36   | -2.77 | -2.17 | -1.23 | -2.10 | -0.68 | -0.90 | -0.91 | -0.85 | -1.25 | -1.64 | -0.13 |
| 1389394_at   |                       |                                        | All stimuli | 0.09   | 2.10  | 1.41  | 0.07      | 1.26  | 1.11  | 0.11    | 1.57  | 1.17  | 0.54  | 2.68  | 1.16  | 1.14  | 1.55  | 1.27  | 0.68  | 2.31  | 0.25  |
| 1389975_at   | Elavl4;RGD156194      | NM_001077651.1;XM_001062807.1          | All stimuli | 1.29   | 0.29  | 0.57  | 1.36      | -0.38 | 0.06  | 1.59    | -0.02 | 0.23  | 1.01  | 2.66  | 2.92  | 0.73  | 1.71  | 2.11  | 0.98  | 2.21  | 1.48  |
| 1390429_at   |                       |                                        | All stimuli | -1.11  | -1.38 | -1.33 | -1.33     | -1.13 | 1.36  | -1.64   | -1.28 | -1.35 | -0.69 | -1.65 | -1.63 | 0.68  | -0.94 | -0.75 | -0.98 | -1.59 | -0.83 |
| 1390493_at   |                       |                                        | All stimuli | 0.16   | 1.36  | 0.91  | 0.01      | 1.36  | 0.80  | 0.08    | 1.12  | 0.78  | -0.05 | 1.49  | 2.26  | 0.08  | 0.67  | 1.26  | -0.12 | 1.11  | 1.58  |
| 1391094_at   |                       |                                        | All stimuli | 1.49   | 1.14  | 1.43  | 1.65      | 1.02  | 1.35  | 1.85    | 0.88  | 0.98  | 0.35  | -1.03 | -1.66 | -0.16 | -0.95 | -1.25 | 0.32  | -1.05 | -1.16 |
| 1391791_at   | Asah3l; predicted     | XM_001053269.1;XM_233138.4             | All stimuli | -1.27  | -1.01 | -1.26 | -1.01     | -1.04 | -1.44 | -1.64   | -1.11 | -0.44 | -1.87 | -1.59 | -1.17 | -0.53 | -1.12 | -0.72 | -1.02 | -1.47 | -0.92 |
| 1392529_at   |                       |                                        | All stimuli | 1.49   | 1.38  | 1.95  | 1.63      | 1.14  | 1.66  | 1.87    | 0.91  | 1.65  | 1.75  | 2.37  | 2.65  | 1.26  | 1.57  | 1.95  | 1.67  | 1.10  | 0.92  |
| 1392968_at   |                       |                                        | All stimuli | 2.92   | 1.71  | 1.81  | 2.92      | 2.18  | 2.23  | 2.84    | 1.60  | 1.96  | -1.19 | -1.45 | -1.71 | -0.29 | -0.33 | -0.89 | -1.39 | -1.35 | -0.60 |
| 1393119_at   |                       |                                        | All stimuli | 0.91   | 1.20  | 0.75  | 0.90      | 1.20  | 0.80  | 1.41    | 1.37  | 0.93  | 1.58  | 0.82  | 0.97  | 0.94  | 0.86  | 0.74  | 1.52  | 0.10  | -0.11 |
| 1395414_at   | Agl; predicted        | XM_001073642.1;XM_342331.3             | All stimuli | 2.69   | 2.71  | 2.37  | 2.64      | 2.11  | 2.05  | 3.00    | 2.25  | 1.95  | -0.90 | -2.   |       |       |       |       |       |       |       |

|              |          |                               |                          |       |       |       |       |       |       |       |       |       |       |       |       |       |       |       |       |       |       |
|--------------|----------|-------------------------------|--------------------------|-------|-------|-------|-------|-------|-------|-------|-------|-------|-------|-------|-------|-------|-------|-------|-------|-------|-------|
| 1368073_at   | Irf1     | NM_012591.1                   | dbcAMP forskolin PACAP38 | -1.46 | 0.05  | 0.56  | -1.92 | 0.11  | 0.21  | -1.92 | 0.07  | 0.29  | -1.14 | -1.04 | -0.59 | -0.43 | -0.25 | -0.12 | 0.44  | 0.54  | 0.56  |
| 1368093_at   | Pde2a    | NM_031079.1                   | dbcAMP forskolin PACAP38 | -0.25 | -2.24 | 1.01  | -0.47 | -2.36 | 1.26  | -0.49 | -1.92 | -0.78 | -0.40 | -2.51 | -2.46 | -0.09 | -0.73 | 1.23  | 0.02  | 1.42  | 1.03  |
| 1368103_at   | Abcb1    | NM_055502.1                   | dbcAMP forskolin PACAP38 | -1.04 | -0.58 | -0.31 | -2.09 | -0.52 | -0.86 | -1.61 | -0.61 | -0.40 | -1.11 | -0.03 | 0.14  | -0.21 | 0.06  | 0.10  | -1.10 | 0.12  | 0.06  |
| 1368146_at   | Dusp1    | NM_053769.3                   | dbcAMP forskolin PACAP38 | 1.02  | 1.21  | 1.35  | 1.05  | 0.97  | 0.78  | 2.07  | 1.31  | 1.27  | -0.47 | 0.19  | 0.69  | 0.28  | -0.04 | 0.20  | -0.82 | 0.28  | 1.46  |
| 1368147_at   | Dusp1    | NM_053769.3                   | dbcAMP forskolin PACAP38 | 1.09  | 1.03  | 1.66  | 1.03  | 0.74  | 1.31  | 2.51  | 1.25  | 1.75  | -0.57 | 0.31  | 0.82  | 0.46  | -0.06 | 0.34  | -0.56 | 0.19  | 1.66  |
| 1368154_at   | Gucy1a3  | NM_017090.1                   | dbcAMP forskolin PACAP38 | -1.21 | -2.24 | -2.14 | -1.68 | -2.40 | -2.13 | -1.53 | -1.65 | -1.57 | -0.63 | -0.77 | -0.58 | -0.18 | -0.36 | -0.38 | -0.96 | -0.72 | -0.15 |
| 1368156_at   | Camk1    | NM_031662.1                   | dbcAMP forskolin PACAP38 | -1.24 | -0.20 | -0.67 | -1.90 | -0.25 | -0.64 | -1.45 | -0.27 | -0.45 | -0.14 | -0.01 | 0.46  | 0.00  | 0.05  | 0.31  | -0.60 | 0.20  | 0.27  |
| 1368213_at   | Por      | NM_031576.1                   | dbcAMP forskolin PACAP38 | 1.15  | 1.46  | 1.32  | 1.20  | 1.19  | 1.25  | 1.42  | 1.35  | 1.15  | 0.53  | 0.75  | 0.29  | 0.33  | 0.17  | 0.14  | 0.66  | 0.15  | -0.02 |
| 1368219_at   | Cicn2    | NM_017137.1                   | dbcAMP forskolin PACAP38 | 0.65  | 2.00  | 1.14  | 1.34  | 2.20  | 1.41  | 1.64  | 1.90  | 1.00  | 0.64  | 0.68  | 0.27  | 0.30  | 0.48  | 0.31  | 0.51  | 0.33  | 0.19  |
| 1368297_at   | Gata2    | NM_033442.1                   | dbcAMP forskolin PACAP38 | 1.61  | 0.84  | 1.08  | 1.49  | 0.78  | 1.08  | 2.04  | 1.24  | 1.31  | -0.63 | -0.15 | 0.05  | 0.15  | 0.36  | 0.07  | -1.62 | -1.37 | -1.22 |
| 1368300_at   | Adora2a  | NM_053294.3                   | dbcAMP forskolin PACAP38 | -0.04 | -1.39 | -1.15 | -0.39 | -1.74 | -1.67 | 0.15  | -1.44 | -0.97 | -0.30 | -1.41 | -1.36 | 0.11  | -0.83 | -0.79 | -1.02 | -0.75 | 0.87  |
| 1368334_at   | Grib7    | NM_053403.2                   | dbcAMP forskolin PACAP38 | -1.06 | -0.40 | -0.17 | -1.25 | -0.22 | -0.37 | -1.78 | -0.36 | 0.25  | -0.92 | -1.51 | -1.23 | -0.34 | -0.22 | -0.25 | -1.34 | -0.91 | -0.99 |
| 1368334_a_at | Ptpr     | NM_053594.1                   | dbcAMP forskolin PACAP38 | -0.15 | -1.43 | -1.81 | -0.53 | -1.80 | -2.31 | -0.56 | -1.70 | -1.81 | -0.09 | 0.59  | 0.55  | 0.02  | 0.37  | 0.28  | -0.29 | 0.84  | 0.89  |
| 1368363_at   | Klf5     | NM_053394.2                   | dbcAMP forskolin PACAP38 | -1.86 | -1.56 | -1.60 | -2.74 | -1.95 | -2.51 | -2.13 | -1.50 | -2.19 | 0.20  | 0.17  | -0.29 | 0.01  | -0.09 | -0.29 | 0.65  | -0.17 | -0.01 |
| 1368408_at   | Gprk5    | NM_030829.1                   | dbcAMP forskolin PACAP38 | -1.00 | -0.69 | 0.24  | -1.63 | 1.90  | 0.61  | 1.66  | -0.54 | -0.57 | 0.50  | 0.03  | -0.02 | 0.16  | 0.10  | 0.46  | 0.33  | 0.13  | -0.13 |
| 1368438_at   | Pde10a   | NM_022236.1                   | dbcAMP forskolin PACAP38 | 3.31  | 4.59  | 3.46  | 4.33  | 4.80  | 4.05  | 4.23  | 4.37  | 3.35  | -0.02 | 0.45  | -0.28 | -0.07 | 0.24  | -0.93 | 0.09  | 0.41  | 0.82  |
| 1368505_at   | Rgs4     | NM_017214.1                   | dbcAMP forskolin PACAP38 | -1.29 | -2.22 | -2.84 | -1.88 | -3.36 | -3.79 | -1.67 | -2.47 | -2.60 | 0.63  | 0.75  | -0.57 | 0.28  | 0.26  | 0.16  | 0.39  | 0.58  | 0.31  |
| 1368506_at   | Rgs4     | NM_017214.1                   | dbcAMP forskolin PACAP38 | -1.35 | -2.24 | -2.72 | -1.94 | -3.43 | -3.72 | -1.68 | -2.58 | -2.76 | 0.83  | 0.79  | -0.74 | 0.26  | 0.09  | -0.18 | 0.44  | 0.30  | -0.02 |
| 1368511_at   | Bhlhb3   | NM_133303.1                   | dbcAMP forskolin PACAP38 | 1.49  | -0.89 | -0.32 | 1.73  | -0.73 | -0.07 | 1.67  | -0.84 | -0.23 | -0.06 | -0.75 | -1.06 | -0.01 | -0.31 | -0.56 | -0.06 | -0.70 | 0.16  |
| 1368541_at   | Emb      | NM_053719.1                   | dbcAMP forskolin PACAP38 | 0.99  | 1.48  | 0.82  | 0.49  | 1.53  | 0.83  | 0.59  | 1.35  | 0.81  | 0.07  | 0.35  | 0.31  | 0.06  | -0.08 | 0.13  | 0.17  | 0.65  | 0.53  |
| 1368542_at   | Zfp423   | NM_053583.1                   | dbcAMP forskolin PACAP38 | -0.45 | -1.39 | -1.49 | -1.90 | -0.84 | -1.12 | -1.29 | -0.99 | -1.05 | -0.24 | -0.47 | -0.45 | -0.28 | -0.21 | -0.23 | -0.70 | -0.62 | -0.67 |
| 1368584_a_at | Cplx2    | NM_053878.1                   | dbcAMP forskolin PACAP38 | -0.49 | -1.21 | -0.12 | -0.61 | -1.29 | -0.38 | 0.04  | -1.48 | -0.82 | -0.48 | -0.94 | -0.44 | -0.97 | -0.85 | -1.33 | -0.69 | -1.03 | -1.22 |
| 1368596_at   | Snf1k    | NM_021693.1                   | dbcAMP forskolin PACAP38 | 4.22  | 2.36  | 2.79  | 4.41  | 2.46  | 2.51  | 4.36  | 2.09  | 2.36  | 0.49  | -0.01 | -0.34 | 0.42  | 0.08  | -0.10 | 0.37  | -0.17 | 1.11  |
| 1368597_at   | Snf1k    | NM_021693.1                   | dbcAMP forskolin PACAP38 | 4.53  | 0.23  | 2.21  | 4.75  | 0.68  | 1.75  | 4.59  | 0.06  | 0.80  | 0.00  | -0.04 | -0.01 | 0.00  | -0.01 | 0.00  | 0.00  | -0.05 | 0.04  |
| 1368599_at   | Sicr2a   | NM_012653.1                   | dbcAMP forskolin PACAP38 | 0.86  | 1.31  | 1.30  | 1.56  | 1.17  | 1.33  | 1.97  | 0.96  | 1.46  | 0.06  | 0.37  | 0.81  | -0.05 | 0.01  | 0.33  | 0.42  | -0.01 | 0.20  |
| 1368634_at   | Kcnh3    | NM_017108.1                   | dbcAMP forskolin PACAP38 | -1.16 | -1.23 | -0.44 | -0.88 | -1.49 | -1.71 | -1.24 | -0.96 | -0.68 | -0.11 | -0.74 | -1.17 | 0.11  | -0.03 | -0.28 | -0.40 | -0.53 | -0.62 |
| 1368637_at   | Pfkfb4   | NM_053333.1                   | dbcAMP forskolin PACAP38 | 1.08  | 0.84  | 1.14  | 1.74  | 0.37  | 1.58  | 2.23  | 0.48  | 1.95  | -0.03 | 0.18  | 0.34  | 0.01  | -0.14 | 0.25  | -0.08 | 0.12  | 0.26  |
| 1368726_a_at | Zfp347   | NM_133390.1                   | dbcAMP forskolin PACAP38 | 1.57  | 0.64  | 1.61  | 2.15  | 1.78  | 1.89  | 2.64  | 1.94  | 1.76  | 0.14  | 0.49  | 0.29  | 0.07  | 0.08  | -0.01 | 0.51  | 0.07  | -0.13 |
| 1368750_a_at | Pde4d    | NM_017032.1                   | dbcAMP forskolin PACAP38 | 3.09  | 2.51  | 1.98  | 3.38  | 2.79  | 2.84  | 3.37  | 2.08  | 2.03  | -1.05 | -1.09 | -1.93 | -0.83 | -0.70 | -0.34 | -0.97 | -1.04 | -0.33 |
| 1368759_at   | Cacng2   | NM_053351.1                   | dbcAMP forskolin PACAP38 | -1.29 | 0.04  | 0.50  | -1.32 | 0.30  | -0.06 | -1.53 | -0.10 | -0.07 | -0.43 | 0.05  | 0.24  | -0.48 | 0.23  | 0.12  | -0.46 | 0.13  | 0.27  |
| 1368918_at   | Pgf      | NM_053595.2                   | dbcAMP forskolin PACAP38 | -0.59 | -0.51 | -1.10 | -0.96 | -1.18 | -1.58 | -0.74 | -0.91 | -1.49 | 0.04  | -1.63 | -2.24 | 0.35  | -1.00 | -0.92 | -0.95 | -0.26 | 0.54  |
| 1368919_at   | Pgf      | NM_053595.2                   | dbcAMP forskolin PACAP38 | -0.61 | -0.62 | -1.11 | -1.14 | -1.16 | -1.62 | -0.73 | -0.98 | -1.53 | 0.02  | -1.64 | -2.24 | 0.19  | -0.83 | -0.79 | -0.94 | -0.23 | 0.62  |
| 1368993_at   | Odz2     | NM_020088.1                   | dbcAMP forskolin PACAP38 | -0.09 | -1.14 | -0.56 | -0.18 | -1.57 | -0.64 | 0.14  | -1.43 | -0.80 | -0.40 | 0.35  | 0.98  | -0.59 | 0.16  | 0.09  | -0.37 | -1.22 | -1.37 |
| 1369027_at   | A4galt   | NM_022240.2                   | dbcAMP forskolin PACAP38 | 1.13  | 0.80  | 1.05  | 1.06  | 0.76  | 1.00  | 1.30  | 0.83  | 1.11  | -0.37 | -0.27 | 0.40  | -0.12 | -0.16 | 0.12  | -0.48 | -0.58 | -0.06 |
| 1369067_at   | Nr4a3    | NM_031628.1                   | dbcAMP forskolin PACAP38 | 6.66  | 0.52  | 2.45  | 7.31  | 0.07  | 2.71  | 7.78  | 1.10  | 3.27  | 0.07  | -0.02 | 0.04  | 0.07  | -0.04 | 0.00  | 0.07  | -0.04 | -0.01 |
| 1369074_at   | Sic38a4  | NM_130748.1                   | dbcAMP forskolin PACAP38 | 0.48  | 1.27  | 1.01  | 0.65  | 1.03  | 0.76  | 0.83  | 1.15  | 0.76  | -0.06 | 0.50  | 0.17  | -0.07 | -0.11 | -0.13 | 0.56  | 1.69  | 1.26  |
| 1369165_at   |          |                               | dbcAMP forskolin PACAP38 | -0.16 | -1.81 | -1.51 | -0.68 | -1.91 | -1.63 | -0.52 | -1.69 | -1.43 | -0.43 | -1.88 | -1.92 | -0.19 | -0.72 | -0.80 | -0.60 | -0.98 | 0.03  |
| 1369174_at   | Smad1    | NM_013130.2                   | dbcAMP forskolin PACAP38 | 1.33  | 1.37  | 1.64  | 1.51  | 1.25  | 1.56  | 1.83  | 0.99  | 1.25  | 0.07  | 0.02  | 0.32  | -0.09 | -0.08 | -0.06 | 0.72  | 0.65  | 0.51  |
| 1369191_at   | Il6      | NM_012589.1                   | dbcAMP forskolin PACAP38 | 0.05  | 2.89  | 3.86  | 0.28  | 2.96  | 4.39  | 0.85  | 2.84  | 4.29  | -0.01 | 0.09  | -0.01 | -0.01 | 0.08  | 0.00  | 0.00  | 0.09  | 0.20  |
| 1369252_at   | Casp8    | NM_022277.1                   | dbcAMP forskolin PACAP38 | 0.14  | 1.64  | 1.55  | 0.95  | 1.20  | 1.41  | 0.24  | 1.14  | 1.62  | 0.00  | 0.18  | 0.34  | 0.01  | -0.30 | 0.03  | 0.04  | 0.04  | -0.06 |
| 1369432_at   | Chrb2    | NM_019297.1                   | dbcAMP forskolin PACAP38 | 0.85  | 0.71  | 1.46  | 0.82  | 0.09  | 1.45  | 1.20  | 0.61  | 0.83  | 0.11  | 0.33  | 0.87  | -0.14 | 0.07  | 0.41  | 0.15  | 0.45  | 0.43  |
| 1369457_a_at | Sytl4    | NM_080410.1                   | dbcAMP forskolin PACAP38 | 0.00  | -1.57 | -0.40 | -0.04 | -2.02 | -1.15 | 0.09  | -1.38 | -0.86 | -0.30 | -1.34 | -0.88 | 0.16  | -0.76 | -0.66 | -0.25 | -0.33 | 0.88  |
| 1369482_a_at | Syn2     | NM_001034020.1;NM_019159.1    | dbcAMP forskolin PACAP38 | -1.12 | 1.58  | 1.39  | -0.41 | 1.53  | 1.10  | -0.22 | 1.62  | 0.98  | -0.39 | 1.89  | 2.29  | 0.02  | 1.16  | 1.29  | -0.16 | 0.79  | 0.37  |
| 1369525_at   | Gata3    | NM_133293.1                   | dbcAMP forskolin PACAP38 | -0.45 | -1.32 | -1.06 | -1.84 | -2.13 | -1.61 | -1.40 | -1.37 | -1.00 | -0.07 | -0.32 | -0.53 | 0.03  | 0.19  | -0.14 | -0.52 | -0.41 | -0.39 |
| 1369644_at   | Lphn2    | NM_134408.1                   | dbcAMP forskolin PACAP38 | 1.41  | -2.02 | -2.04 | 1.75  | -1.30 | -1.77 | 1.74  | -2.02 | -1.27 | -0.56 | -2.22 | -2.63 | -0.69 | -1.01 | -1.08 | -0.71 | -1.38 | -0.34 |
| 1369649_at   | Cacna2d1 | NM_012919.2                   | dbcAMP forskolin PACAP38 | -0.16 | -1.51 | -0.66 | -0.36 | -1.47 | -0.83 | -0.06 | -1.27 | -0.98 | -0.23 | -0.76 | -0.12 | -0.06 | -0.14 | -0.38 | -0.20 | -0.99 | -0.96 |
| 1369659_at   | Cqa      | NM_053918.1                   | dbcAMP forskolin PACAP38 | 2.87  | 2.96  | 5.07  | 3.77  | 0.61  | 3.92  | 4.39  | 1.13  | 4.65  | 1.21  | 2.52  | 3.03  | 0.65  | 2.05  | 2.63  | 0.73  | 0.41  | 1.58  |
| 1369665_a_at | Il18     | NM_019165.1                   | dbcAMP forskolin PACAP38 | 0.17  | 1.09  | 1.59  | 0.03  | 1.97  | 1.90  | 0.29  | 1.20  | 2.72  | 0.16  | 0.06  | -0.12 | -0.12 | 0.14  | -0.03 | -0.13 | 0.39  | 0.48  |
| 1369686_at   | Dcamk1   | NM_053343.2                   | dbcAMP forskolin PACAP38 | 0.84  | 3.19  | 2.46  | 0.92  | 2.94  | 1.88  | 0.92  | 2.98  | 1.61  | 0.51  | 1.58  | 2.91  | -0.42 | -1.06 | 0.83  | 0.75  | -0.41 | 0.87  |
| 1369703_at   | Epas1    | NM_023090.1                   | dbcAMP forskolin PACAP38 | 0.12  | -2.24 | -2.01 | 0.23  | -2.42 | -1.50 | 0.73  | -1.98 | -1.59 | -0.28 | -2.89 | -4.04 | 0.03  | -0.81 | -1.66 | -0.42 | -1.68 | -0.22 |
| 1369737_at   | Crem     | NM_017334.1                   | dbcAMP forskolin PACAP38 | 5.49  | 3.64  | 4.66  | 6.12  | 3.59  | 4.71  | 6.09  | 3.29  | 4.48  | -0.01 | 0.06  | 0.04  | -0.15 | -0.24 | -0.01 | 0.65  | 0.60  | 1.48  |
| 1369739_s_at | Crem     | NM_013096.1;NM_017334.1       | dbcAMP forskolin PACAP38 | 6.72  | 4.27  | 4.89  | 7.11  | 4.47  | 5.33  | 7.19  | 3.92  | 5.18  | 0.41  | 0.52  | -0.10 | 0.31  | -0.17 | -0.22 | 1.28  | 0.73  | 0.41  |
| 1369777_a_at | Shank2   | NM_133440.1;NM_133441.1       | dbcAMP forskolin PACAP38 | -0.45 | -1.59 | -1.01 | -0.67 | -1.25 | -0.94 | -0.56 | -1.06 | -0.73 | 0.24  | -0.47 | -0.52 | -0.13 | -0.25 | -0.25 | -0.21 | -0.62 | 0.20  |
| 1369785_at   | Ppat     | XM_001076038.1;XM_679602.2    | dbcAMP forskolin PACAP38 | 1.21  | 0.39  | 1.12  | 1.36  | 0.67  | 1.21  | 1.75  | 0.81  | 1.13  | -0.10 | -0.40 | -0.15 | 0.06  | -0.13 | -0.05 | -0.45 | -0.25 | 0.23  |
| 1369886_a_at | Cabp1    | NM_001033675.1;NM_001033676.1 | dbcAMP forskolin PACAP38 | -0.28 | -1.30 | -0.92 | -0.39 | -1.37 | -1.21 | -0.17 | -1.27 | -0.97 | -0.05 | -0.89 | -0.54 | -0.18 | 0.00  | -0.39 | -0.24 | -1.01 | -0.18 |
| 1369956_at   | Ifngr    | NM_053783.1                   | dbcAMP forskolin PACAP38 | -0.20 | -1.35 | -1.11 | -0.37 | -1.28 | -1.06 | -0.30 | -1.15 | -0.98 | 0.05  | -0.80 | -0.65 | 0.05  | -0.34 | -0.19 | -0.18 | -0.50 | 0.26  |
| 1369958_at   | Rhob     | NM_022542.1                   | dbcAMP forskolin PACAP38 | 1.83  | 1.84  | 1.75  | 1.87  | 1.81  | 1.67  | 1.79  | 1.54  | 1.53  | 1.10  | 1.16  | 0.60  | 0.43  | 0.26  |       |       |       |       |



|              |                  |                               |                            |       |       |       |       |       |       |       |       |       |       |       |       |       |       |       |       |       |       |
|--------------|------------------|-------------------------------|----------------------------|-------|-------|-------|-------|-------|-------|-------|-------|-------|-------|-------|-------|-------|-------|-------|-------|-------|-------|
| 1370805_at   | Cited1           | NM_172055.2                   | dbcAMP forskolin PACAP38   | 1.00  | 1.87  | 1.40  | 1.37  | 2.29  | 1.63  | 1.65  | 1.85  | 1.85  | -0.07 | 0.90  | 0.72  | 0.00  | 0.29  | 0.27  | 0.00  | 0.75  | 0.58  |
| 1370830_at   |                  |                               | dbcAMP forskolin PACAP38   | 1.08  | -0.20 | 0.30  | -1.25 | -0.25 | 0.42  | 1.52  | 0.29  | 0.43  | 0.12  | -1.01 | -1.62 | -0.15 | -0.61 | -0.96 | 0.35  | -1.19 | 0.81  |
| 1370884_at   | RGD1560795_pred  | XM_001069367.1+XM_342714.3.XF | dbcAMP forskolin PACAP38   | -0.22 | -1.50 | -0.88 | -1.36 | -1.61 | -1.12 | -0.52 | -1.26 | -0.61 | 0.00  | -0.77 | -0.31 | 0.03  | -0.16 | -0.09 | -0.01 | -0.16 | 0.88  |
| 1370942_at   |                  |                               | dbcAMP forskolin PACAP38   | -0.41 | -1.66 | -1.20 | -0.52 | -1.24 | -1.32 | -0.53 | -1.37 | -1.11 | -0.76 | -0.82 | 0.53  | -0.42 | -0.63 | 0.48  | -0.92 | -1.29 | -0.72 |
| 1370952_at   | Gstm2            | NM_177426.1                   | dbcAMP forskolin PACAP38   | 0.28  | -1.91 | -0.42 | 0.14  | -1.35 | -0.56 | 0.31  | -1.15 | 0.23  | 0.01  | -2.03 | -1.04 | 0.14  | -0.44 | -0.28 | -0.02 | -2.28 | -1.61 |
| 1370968_at   | NfkB1            | XM_001075876.1:XM_342346.3    | dbcAMP forskolin PACAP38   | 2.10  | 1.82  | 1.31  | 2.37  | 1.98  | 2.00  | 2.64  | 1.56  | 1.76  | 0.41  | -0.27 | -0.16 | 0.12  | -0.14 | -0.22 | 0.93  | 0.06  | 0.09  |
| 1371014_at   |                  |                               | dbcAMP forskolin PACAP38   | 0.78  | -2.81 | -1.61 | 0.42  | -1.11 | -2.23 | 0.76  | -2.59 | -2.00 | -0.27 | -0.75 | -0.51 | -0.33 | -1.37 | -1.01 | -0.39 | 0.72  | 2.40  |
| 1371019_at   | Trib1            | NM_023985.1                   | dbcAMP forskolin PACAP38   | 0.17  | 2.03  | 1.40  | 0.69  | 1.18  | 1.51  | 1.35  | 1.72  | 1.39  | 3.09  | 2.46  | 1.55  | 0.51  | -0.14 | 1.13  | 3.63  | 1.48  | 2.82  |
| 1371024_at   | Cutl1            | XM_001070410.1:XM_001070482.1 | dbcAMP forskolin PACAP38   | -0.16 | -1.14 | -0.84 | -0.38 | -1.26 | -1.48 | -0.22 | -1.22 | -0.79 | 0.17  | -0.35 | -0.14 | -0.19 | -0.19 | -0.17 | 0.07  | -0.36 | -0.28 |
| 1371030_at   | Spp2             | NM_053577.1:XM_001065906.1    | dbcAMP forskolin PACAP38   | 0.87  | 2.63  | 1.89  | 0.88  | 2.51  | 1.78  | 1.49  | 2.64  | 1.85  | 0.04  | -0.06 | 1.36  | -0.01 | 0.06  | 0.60  | -0.07 | -0.87 | 0.61  |
| 1371063_at   | Sh3gl2           | XM_001070855.1+XM_342857.3    | dbcAMP forskolin PACAP38   | 0.51  | 0.94  | 1.53  | 1.13  | 0.65  | 1.19  | 1.29  | 0.60  | 1.36  | 0.69  | 0.97  | 1.24  | 0.40  | -0.06 | 0.70  | 0.86  | 0.17  | 0.57  |
| 1371120_s_at | Bdkrb2           | NM_173100.1                   | dbcAMP forskolin PACAP38   | 2.36  | 1.16  | 1.01  | 1.78  | 0.04  | 1.08  | 2.70  | 0.62  | 0.92  | 0.86  | 3.12  | 2.35  | 0.40  | 0.56  | 1.01  | 0.53  | 1.11  | 0.66  |
| 1371131_a_at | Txnip            | NM_001008767.1                | dbcAMP forskolin PACAP38   | -1.53 | -1.16 | -0.52 | -2.26 | -2.15 | -1.85 | -2.11 | -0.73 | -0.44 | -1.74 | -1.69 | -0.36 | -0.38 | -0.46 | -0.23 | -2.09 | -0.66 | 0.27  |
| 1371256_at   | Pipr18           | NM_001013111.1                | dbcAMP forskolin PACAP38   | 0.83  | 1.37  | 1.28  | 0.81  | 1.31  | 1.41  | 0.98  | 1.16  | 1.18  | 0.29  | 0.59  | 0.07  | 0.17  | 0.28  | 0.24  | 0.06  | -0.10 | 0.16  |
| 1371332_at   | LOC684681        | XM_001071565.1                | dbcAMP forskolin PACAP38   | -0.99 | -1.89 | 0.52  | 1.38  | -1.96 | -0.61 | -0.99 | -1.73 | -0.38 | 0.51  | -1.09 | -0.13 | 0.19  | 0.00  | 0.24  | 0.37  | 0.75  | 0.18  |
| 1371350_at   | LOC683283:RGD1   | XM_001065243.1:XM_573428.2    | dbcAMP forskolin PACAP38   | 1.53  | 0.48  | 1.02  | 1.64  | 0.64  | 1.19  | 1.90  | 0.69  | 1.00  | 0.82  | -0.10 | -0.29 | 0.22  | 0.06  | -0.07 | 0.74  | -0.08 | 0.06  |
| 1371391_at   |                  |                               | dbcAMP forskolin PACAP38   | 1.77  | 2.90  | 2.83  | 2.53  | 2.87  | 2.90  | 2.88  | 2.87  | 2.62  | 0.06  | 0.37  | 0.09  | -0.13 | 0.00  | -0.12 | 0.23  | -0.03 | -0.10 |
| 1371412_a_at |                  |                               | dbcAMP forskolin PACAP38   | 0.31  | 1.79  | 1.61  | 0.06  | 1.50  | 1.24  | -0.12 | 1.19  | 1.20  | -0.09 | -1.66 | -0.74 | -0.09 | -0.67 | -0.78 | 0.65  | 0.64  | 1.41  |
| 1371446_at   | Mapkapk2         | NM_178102.2                   | dbcAMP forskolin PACAP38   | 1.65  | 1.26  | 1.19  | 2.19  | 1.54  | 1.45  | 2.48  | 1.25  | 1.39  | 0.39  | -0.09 | -0.33 | 0.16  | -0.03 | -0.17 | 0.62  | 0.09  | 0.11  |
| 1371485_at   |                  |                               | dbcAMP forskolin PACAP38   | 1.68  | 0.73  | 1.17  | 2.80  | 0.48  | 0.91  | 2.40  | -0.04 | 0.65  | -0.61 | -0.42 | -0.33 | -0.49 | -0.49 | -0.48 | -0.73 | -0.40 | 0.30  |
| 1371522_at   | RGD1563127_pred  | XM_001080776.1:XM_347035.3    | dbcAMP forskolin PACAP38   | 2.07  | 1.07  | 1.22  | 2.19  | 1.05  | 1.24  | 2.11  | 0.88  | 1.04  | 0.43  | -0.04 | -0.09 | 0.11  | -0.04 | -0.08 | 0.08  | -0.19 | 0.08  |
| 1371684_at   | Pelo             | NM_001007634.1                | dbcAMP forskolin PACAP38   | 1.16  | 1.21  | 0.82  | 1.21  | 0.68  | 0.58  | 1.51  | 0.81  | 0.69  | 1.90  | 0.96  | 0.62  | 0.56  | 0.31  | 0.62  | 1.99  | 0.83  | 0.53  |
| 1371692_at   | Mil11            | NM_001013912.1                | dbcAMP forskolin PACAP38   | 1.11  | 0.92  | 0.66  | 1.16  | 0.60  | 1.58  | 1.22  | 0.44  | 0.37  | 1.07  | 1.66  | 1.62  | 0.62  | 0.64  | 0.67  | 0.72  | 0.90  | 0.83  |
| 1371702_at   | Tm4sf2           | XM_001062155.1:XM_343768.3    | dbcAMP forskolin PACAP38   | -0.15 | -1.46 | -0.88 | -0.14 | -1.59 | -0.37 | -0.06 | -1.43 | -0.83 | -0.21 | -0.56 | 0.07  | -0.07 | -0.32 | -0.22 | -0.20 | -0.82 | -0.12 |
| 1371864_at   |                  |                               | dbcAMP forskolin PACAP38   | -1.24 | -0.19 | -0.44 | -1.90 | -0.23 | -0.59 | -1.44 | -0.16 | -0.66 | -0.55 | -0.53 | 0.44  | -0.27 | -0.30 | 0.15  | -1.04 | -0.59 | 0.24  |
| 1371924_at   | Olfm3_predicted  | XM_001064747.1+XM_227535.3    | dbcAMP forskolin PACAP38   | 2.68  | 0.40  | 1.43  | 3.00  | 0.45  | 1.69  | 2.88  | 0.12  | 1.59  | 0.07  | 1.85  | 3.09  | 0.00  | 0.01  | 1.62  | 0.70  | 1.57  | 1.89  |
| 1371932_at   | Zfyw21_predicted | XM_001072193.1+XM_343115.3    | dbcAMP forskolin PACAP38   | -1.28 | -0.34 | 0.86  | -2.34 | 0.09  | -1.45 | 0.07  | -0.86 | -1.04 | -0.81 | -0.06 | -0.33 | -0.61 | -0.52 | 0.29  | -1.14 | -0.70 | 0.32  |
| 1372055_at   | RGD1306534_pred  | XR_008866.1                   | dbcAMP forskolin PACAP38   | 0.05  | -0.14 | 2.34  | 1.39  | -0.40 | 0.88  | 2.23  | -0.34 | -1.39 | -0.17 | -0.32 | -0.14 | -0.09 | -0.18 | -0.29 | -0.15 | -0.18 | 2.38  |
| 1372064_at   | Cxcl16           | NM_001017478.1                | dbcAMP forskolin PACAP38   | 1.00  | 1.23  | 1.41  | 0.21  | 1.32  | 1.45  | 0.33  | 1.14  | 1.21  | 0.23  | -1.86 | -0.22 | 0.10  | -0.65 | -0.29 | 0.79  | -0.56 | 0.05  |
| 1372086_at   | RGD1311955_pred  | XM_001065975.1                | dbcAMP forskolin PACAP38   | 1.20  | 0.25  | 0.44  | 1.68  | 0.29  | 0.73  | 2.27  | 0.40  | 0.85  | 0.28  | -0.44 | -0.39 | 0.10  | -0.18 | -0.26 | 0.16  | -0.49 | -0.61 |
| 1372163_at   |                  |                               | dbcAMP forskolin PACAP38   | 0.71  | 1.40  | 1.07  | 0.77  | 1.70  | 1.20  | 0.88  | 1.37  | 0.93  | -0.13 | 0.39  | 0.94  | -0.07 | 0.14  | 0.38  | -0.03 | 0.44  | 0.65  |
| 1372176_at   | Prkca            | XM_001081588.1:XM_343975.3    | dbcAMP forskolin PACAP38   | 0.70  | 1.75  | 0.97  | 0.94  | 1.49  | 0.86  | 0.93  | 1.35  | 0.65  | 0.54  | 1.40  | 0.72  | 0.16  | 0.92  | 0.59  | 0.65  | 0.73  | -0.28 |
| 1372223_at   | Cpeb4_predicted  | XM_001064017.1+XM_220269.4    | dbcAMP forskolin PACAP38   | 2.26  | 0.97  | 1.57  | 2.30  | 1.14  | 1.71  | 2.24  | 0.90  | 1.27  | 0.46  | 0.36  | 0.59  | 0.13  | 0.15  | 0.29  | 0.35  | 0.35  | 0.47  |
| 1372229_at   | Pdk3             | XM_001056460.1+XM_216091.3    | dbcAMP forskolin PACAP38   | 0.91  | 2.90  | 2.24  | 1.11  | 3.01  | 2.49  | 1.30  | 3.05  | 2.36  | -0.02 | 0.14  | 0.11  | -0.11 | -0.12 | 0.04  | -0.03 | -0.10 | -0.12 |
| 1372248_at   | Seen1_predicted  | XM_001063428.1+XM_215423.4    | dbcAMP forskolin PACAP38   | -0.83 | -0.92 | -1.07 | -1.69 | -0.51 | -0.96 | -1.80 | -0.76 | -0.74 | -1.91 | -1.12 | -0.05 | -0.72 | -0.52 | 0.09  | -2.42 | -0.82 | 0.00  |
| 1372316_at   | RGD1311939_pred  | XM_001061539.1:XM_233838.4    | dbcAMP forskolin PACAP38   | -0.65 | -1.94 | -1.20 | -1.19 | -1.79 | -1.43 | -1.48 | -1.49 | -0.92 | -0.20 | -1.39 | -1.19 | -0.32 | -0.60 | -0.76 | -0.59 | -0.75 | 0.29  |
| 1372318_at   |                  |                               | dbcAMP forskolin PACAP38   | 1.70  | 1.07  | 0.73  | 2.02  | 0.84  | 0.87  | 2.20  | 0.69  | 0.62  | 0.29  | 0.07  | 0.81  | -0.09 | 0.00  | 0.31  | 0.09  | -0.21 | 0.17  |
| 1372345_at   |                  |                               | dbcAMP forskolin PACAP38   | -0.96 | -1.36 | -1.33 | -0.85 | -1.23 | -1.39 | -0.68 | -1.46 | -1.35 | -0.48 | -0.84 | 0.39  | -0.54 | 0.13  | 0.90  | -0.92 | -1.00 | -0.15 |
| 1372352_at   | Galk2_predicted  | NM_001013919.1                | dbcAMP forskolin PACAP38   | 0.99  | 1.29  | 0.80  | 0.87  | 1.84  | 0.84  | 0.83  | 1.41  | 0.79  | -0.22 | -0.05 | 0.37  | -0.11 | -0.10 | 0.37  | -0.44 | -0.09 | 0.28  |
| 1372359_at   | Ier2             | NM_001009541.1                | dbcAMP forskolin PACAP38   | -1.28 | 1.00  | 0.87  | -2.34 | 0.09  | 1.65  | 0.28  | -0.87 | 0.85  | -1.72 | -0.36 | 0.31  | 0.65  | -0.52 | 0.29  | -1.88 | 0.54  | 0.32  |
| 1372449_at   |                  |                               | dbcAMP forskolin PACAP38   | -0.18 | -1.22 | -0.30 | -0.36 | -1.20 | -0.55 | -0.29 | -1.17 | -0.27 | 0.00  | 0.02  | -0.02 | 0.04  | -0.28 | 0.07  | -0.07 | 0.03  | -0.41 |
| 1372472_at   | LOC679221        | XM_001054908.1:XM_001054963.1 | dbcAMP forskolin PACAP38   | -0.15 | -1.09 | -0.48 | -0.23 | -1.02 | -0.56 | -0.19 | -1.02 | -0.70 | -0.41 | -0.72 | -0.37 | -0.30 | -0.34 | -0.31 | -0.31 | -0.66 | -0.47 |
| 1372531_at   | Pfplbp2          | XM_001072388.1+XM_219201.4:XM | dbcAMP forskolin PACAP38   | 0.40  | -1.94 | -1.08 | 0.53  | -2.70 | -0.99 | 0.67  | -3.10 | -1.15 | -0.16 | 1.64  | 2.48  | 0.13  | 0.26  | 1.54  | -0.89 | 0.01  | 0.46  |
| 1372542_at   |                  |                               | dbcAMP forskolin PACAP38   | 0.06  | -1.56 | -1.34 | -0.07 | -1.71 | -1.45 | -0.06 | -1.89 | -1.15 | 0.02  | -1.10 | -2.24 | 0.11  | -0.12 | -0.64 | 0.05  | -0.98 | -0.68 |
| 1372640_at   | Pih16_predicted  | XM_215351.4                   | dbcAMP forskolin PACAP38   | 1.19  | 0.45  | 0.26  | 1.51  | 0.90  | 1.00  | 1.86  | 0.65  | 0.92  | -0.15 | -0.14 | -0.15 | 0.01  | -0.07 | -0.12 | -0.27 | -0.20 | -0.10 |
| 1372684_at   | Smtm             | XM_001061663.1:XM_001066720.1 | dbcAMP forskolin PACAP38   | 1.81  | 0.68  | 1.36  | 2.40  | 0.63  | 1.52  | 2.86  | 1.20  | 1.82  | 0.60  | -0.47 | 0.05  | 0.24  | 0.17  | -0.22 | 1.82  | 0.26  | 1.25  |
| 1372698_at   | RGD1305094_pred  | XR_008807.1                   | dbcAMP forskolin PACAP38   | -1.03 | -1.00 | -0.55 | -1.64 | -0.45 | -0.85 | -1.60 | -0.68 | -0.47 | -0.10 | -0.32 | -0.31 | 0.03  | 0.02  | -0.22 | -0.22 | -0.29 | -0.26 |
| 1372726_at   | Hist1h4b         | NM_022686.2                   | dbcAMP forskolin PACAP38   | -0.76 | -2.47 | -1.99 | -1.26 | -2.14 | -1.85 | -0.60 | -2.16 | -1.39 | 0.38  | -1.89 | -1.15 | 0.21  | -0.33 | 0.09  | 0.24  | -1.58 | -0.30 |
| 1372729_at   | Procr            | NM_001025733.2                | dbcAMP forskolin PACAP38   | 1.05  | 1.61  | 1.85  | 1.13  | 1.21  | 0.73  | 1.21  | 1.35  | 0.97  | 0.45  | 1.43  | 0.98  | -0.16 | -0.01 | 0.23  | 0.07  | 0.72  | 0.60  |
| 1372744_at   | Pkp4_predicted   | XM_001058290.1+XM_215733.4    | dbcAMP forskolin PACAP38   | -0.13 | -1.52 | -0.90 | -0.22 | -1.19 | -1.01 | -0.04 | -1.25 | -0.54 | -0.02 | 0.17  | -0.11 | -0.06 | 0.00  | 0.06  | -0.23 | -0.14 | -0.46 |
| 1372779_at   | B3gnt1_predicted | XM_001061345.1+XM_223674.3    | dbcAMP forskolin PACAP38   | 2.16  | 0.76  | 1.21  | 2.19  | 0.65  | 0.79  | 2.16  | 0.71  | 0.93  | 0.54  | -0.01 | 0.17  | 0.21  | -0.09 | 0.24  | 0.22  | -0.43 | -0.13 |
| 1372823_at   |                  |                               | dbcAMP forskolin PACAP38   | -1.05 | -0.92 | -1.11 | -1.71 | -0.21 | -0.73 | -1.37 | -0.72 | -0.64 | -0.73 | -0.69 | -0.25 | -0.26 | 0.05  | 0.18  | -0.91 | -0.16 | 0.31  |
| 1372836_at   |                  |                               | dbcAMP forskolin PACAP38   | 1.05  | 1.77  | 1.76  | 1.42  | 1.48  | 1.82  | 1.43  | 1.20  | 1.43  | 0.08  | 0.42  | 0.62  | 0.01  | -0.06 | 0.26  | 0.06  | -0.24 | 0.22  |
| 1372897_at   | Plod2            | NM_175869.2                   | dbcAMP forskolin PACAP38   | 0.09  | -1.63 | -1.35 | -0.16 | -1.79 | -1.62 | 0.01  | -1.33 | -1.07 | -0.11 | -1.04 | -1.38 | 0.04  | -0.35 | -0.81 | 0.59  | -0.32 | 0.30  |
| 1372953_at   | Ncald            | NM_001024371.1                | dbcAMP forskolin PACAP38   | 1.67  | 0.37  | 0.46  | 1.93  | 0.28  | 0.41  | 2.21  | 0.06  | 0.38  | -0.62 | -0.11 | -0.31 | -0.10 | 0.41  | -0.04 | -0.89 | 0.72  | 1.13  |
| 1373035_at   |                  |                               | dbcAMP forskolin PACAP38   | 2.42  | -0.06 | 0.43  | 2.29  | -0.05 | 0.60  | 2.31  | -0.07 | 0.61  | 0.75  | -0.23 | -0.81 | -0.02 | -0.67 | -0.66 | 0.86  | -0.32 | 0.46  |
| 1373058_at   | Tmem30a          | NM_001004248.1                | dbcAMP forskolin PACAP38</ |       |       |       |       |       |       |       |       |       |       |       |       |       |       |       |       |       |       |



|           |    |                    |                               |       |       |       |       |       |       |       |       |       |       |       |       |       |       |       |       |       |       |
|-----------|----|--------------------|-------------------------------|-------|-------|-------|-------|-------|-------|-------|-------|-------|-------|-------|-------|-------|-------|-------|-------|-------|-------|
| 1373883   | at |                    | dbcAMP forskolin PACAP38      | -0.62 | -1.03 | -0.69 | -1.88 | -0.99 | -1.03 | -1.60 | -0.78 | -0.57 | -1.07 | -0.74 | -0.32 | -0.53 | -0.12 | 0.06  | -1.30 | -0.60 | 0.29  |
| 1373891   | at |                    | dbcAMP forskolin PACAP38      | -0.45 | -1.20 | -0.30 | -0.75 | -1.08 | -0.92 | -0.79 | -1.04 | -0.93 | -0.54 | -0.77 | -1.06 | -0.12 | -0.25 | -0.56 | -0.49 | -0.48 | -0.65 |
| 1374030   | at | LOC684112          | XM_001068984.1                | 1.59  | 1.65  | 1.23  | 1.68  | 1.81  | 1.19  | 2.13  | 1.19  | 0.99  | -0.28 | -0.14 | -0.30 | -0.23 | -0.29 | -0.43 | -0.49 | -0.28 | -0.05 |
| 1374080   | at | Six5_predicted     | XM_001075407.1:XM_218412.4    | -1.17 | -0.63 | -0.60 | -1.79 | -1.10 | -0.31 | -1.09 | -0.42 | -0.24 | -0.50 | -0.27 | -0.47 | -0.07 | 0.06  | -0.25 | -0.49 | -0.02 | -0.04 |
| 1374157   | at |                    | dbcAMP forskolin PACAP38      | 3.01  | 2.25  | 1.57  | 1.83  | 1.56  | 1.31  | 2.33  | 1.26  | 0.89  | -0.27 | -0.78 | -1.28 | -0.11 | -0.62 | -0.71 | -0.36 | -0.87 | -0.88 |
| 1374187   | at |                    | dbcAMP forskolin PACAP38      | 0.03  | -1.33 | -0.83 | -0.43 | -1.13 | -1.28 | -0.15 | -1.21 | -0.95 | -0.52 | -0.86 | 0.35  | -0.45 | -0.53 | 0.11  | -0.65 | -1.42 | -0.39 |
| 1374309   | at | RGD1306155_pred    | NM_001037218.1                | -0.24 | -1.04 | 0.15  | -0.81 | -1.52 | -0.24 | -0.66 | -1.09 | 0.13  | -0.91 | -1.26 | -0.43 | -0.56 | -0.48 | -0.51 | -1.02 | -1.12 | -0.64 |
| 1374413   | at | Ubl3               | NM_001015030.1                | 1.06  | 0.38  | 0.34  | 1.34  | 0.31  | 0.40  | 1.36  | 0.26  | 0.34  | -0.08 | -0.06 | 0.07  | -0.01 | -0.03 | 0.16  | -0.12 | 0.01  | 0.29  |
| 1374417   | at | LOC680451+68460    | NM_001057022.1+XM_001070566.1 | -1.13 | -0.27 | -0.39 | -1.56 | -0.15 | -0.52 | -1.54 | -0.19 | -0.24 | -0.50 | -0.70 | 0.04  | 0.07  | -0.08 | -0.02 | -0.44 | 0.05  | 0.47  |
| 1374425   | at | Tle1_predicted     | XM_001066887.1+XM_342851.3    | -1.07 | -2.29 | -2.72 | -2.15 | -2.72 | -1.81 | -1.96 | -1.72 | -0.94 | -0.38 | 0.32  | 0.30  | -0.23 | 0.27  | 0.48  | -0.16 | 0.34  | 0.06  |
| 1374493   | at |                    | dbcAMP forskolin PACAP38      | 0.43  | 1.30  | 0.05  | -0.40 | 1.14  | -0.08 | 0.15  | 1.72  | 0.13  | -2.58 | -0.96 | -0.68 | -0.61 | -0.15 | -0.69 | -3.48 | -0.27 | 1.13  |
| 1374530   | at | Fzd7_predicted     | XM_001069570.1:XM_237191.4    | 3.41  | 4.17  | 4.11  | 3.68  | 4.02  | 4.15  | 4.05  | 3.68  | 3.81  | 0.40  | 0.39  | 1.26  | 0.09  | 0.09  | 0.14  | -0.18 | -1.18 | -0.86 |
| 1374540   | at | Cdc47              | NM_001025693.1                | -1.51 | -1.47 | -1.28 | -2.50 | -1.20 | -1.50 | -2.94 | -1.47 | -1.18 | -2.12 | -1.00 | -1.09 | -0.67 | -0.57 | -0.67 | -2.75 | -0.56 | -0.69 |
| 1374563   | at | RGD1561004_pred    | NM_001057408.1                | 2.04  | 2.26  | 2.05  | 2.27  | 2.29  | 1.85  | 2.25  | 2.10  | 1.55  | 0.43  | -0.65 | 0.04  | -0.05 | -0.77 | -0.26 | 0.20  | 0.13  |       |
| 1374567   | at | Pscc2              | NM_001078700.1:XM_235146.4    | -1.41 | -0.18 | -0.60 | -1.23 | 0.06  | 0.53  | -1.01 | -0.11 | -0.34 | -0.61 | -0.69 | -0.08 | -0.38 | -0.21 | -0.08 | -0.54 | -0.40 | -0.12 |
| 1374610   | at |                    | dbcAMP forskolin PACAP38      | 1.25  | 1.93  | 0.76  | 1.88  | 1.26  | 0.95  | 2.32  | 1.30  | 0.90  | 1.54  | 1.25  | 0.40  | 0.14  | 0.08  | 0.19  | 2.11  | 0.64  | 0.84  |
| 1374625   | at | Hes6               | NM_001013179.1                | -0.77 | -1.57 | -1.11 | -1.42 | -1.60 | -1.13 | -1.18 | -1.72 | -0.80 | -0.86 | -1.56 | -0.75 | -0.11 | -0.07 | -0.23 | -1.34 | -0.65 | -0.92 |
| 1374630   | at | Clic3              | NM_001013080.1                | 0.20  | 1.16  | 0.96  | -0.20 | 1.27  | 0.61  | 0.12  | 1.39  | 1.17  | 0.40  | 0.89  | 0.70  | 0.09  | 0.09  | 0.27  | -0.54 | 0.07  | -0.50 |
| 1374667   | at |                    | dbcAMP forskolin PACAP38      | 0.29  | 1.26  | 0.74  | -0.13 | 1.27  | 0.58  | 0.05  | 1.08  | 0.25  | -0.27 | 0.18  | 1.01  | -0.16 | -0.56 | 0.40  | -0.30 | 0.75  | 1.67  |
| 1374681   | at |                    | dbcAMP forskolin PACAP38      | -0.38 | -1.19 | -0.92 | -0.82 | -1.32 | -0.79 | -0.39 | -1.32 | -0.63 | 0.21  | 1.40  | 1.52  | 0.07  | 0.29  | 0.90  | 0.06  | -0.10 | -0.26 |
| 1374718   | at |                    | dbcAMP forskolin PACAP38      | 1.14  | 0.59  | 1.22  | 1.12  | 0.93  | 1.21  | 1.09  | 0.78  | 0.97  | -0.82 | -1.47 | -0.72 | -0.41 | -0.83 | -0.38 | 1.88  | 0.54  | 1.37  |
| 1374814   | at |                    | dbcAMP forskolin PACAP38      | 0.20  | -1.02 | -0.84 | 0.07  | -1.82 | -1.58 | 0.25  | -1.30 | -1.24 | 1.66  | 1.75  | 0.68  | 0.72  | 1.14  | 1.02  | 0.88  | 0.35  | 0.37  |
| 1374933   | at | Mcam               | NM_001034009.1:NM_023983.3    | 1.00  | 0.43  | 0.68  | 1.07  | 0.02  | 0.31  | 1.41  | 0.24  | 0.73  | -0.35 | 0.62  | 1.34  | -0.06 | 0.22  | 0.60  | -0.42 | 0.35  | 0.53  |
| 1374957   | at |                    | dbcAMP forskolin PACAP38      | -1.15 | -0.16 | 0.23  | -1.62 | -1.13 | -0.24 | -1.55 | -0.50 | -0.28 | -0.30 | 0.21  | 0.23  | -0.15 | 0.04  | -0.01 | -0.28 | 0.41  | 0.47  |
| 1375026   | at |                    | dbcAMP forskolin PACAP38      | -0.28 | -2.22 | 0.37  | -0.41 | -2.94 | -0.72 | -0.37 | -1.70 | -0.23 | -0.04 | 0.04  | -0.12 | 0.00  | 0.38  | 0.39  | -0.04 | 0.09  | -0.05 |
| 1375043   | at | Fos                | NM_022197.1                   | 4.07  | 1.23  | 2.31  | 3.66  | 1.31  | 1.51  | 3.69  | 1.36  | 1.69  | 2.86  | 1.03  | -0.34 | 0.56  | 0.19  | -0.26 | 5.34  | 2.28  | 1.93  |
| 1375052   | at | LOC501015          | NM_001056441.1+XM_576426.2    | -0.51 | -4.26 | -3.47 | -0.29 | -4.69 | -3.29 | 1.76  | -4.07 | -2.56 | 0.44  | -4.34 | -4.30 | 0.02  | -0.32 | -1.11 | -1.61 | -0.36 | 0.33  |
| 1375055   | at | Tspan18_predicted  | XM_001078551.1+XM_230297.4    | -1.01 | -0.79 | 0.45  | 1.54  | -0.52 | 0.66  | 1.65  | -0.24 | 0.39  | -0.58 | -2.01 | -1.89 | -0.47 | -0.29 | -1.51 | -0.88 | -0.77 | -0.59 |
| 1375085   | at | LOC497933          | XM_001078825.1+XM_573120.2    | 1.09  | 1.16  | 0.34  | 1.24  | 1.33  | 0.65  | 1.53  | 1.11  | 0.25  | -0.27 | 0.56  | -0.32 | -0.09 | 0.39  | 0.06  | -0.20 | 0.05  | -0.82 |
| 1375123   | at | Sox4_predicted     | XM_344594.3                   | 2.30  | 1.63  | 1.93  | 2.46  | 1.25  | 2.35  | 2.82  | 1.14  | 1.96  | 1.73  | 1.51  | 2.99  | 0.63  | 0.47  | 1.36  | 2.27  | 2.30  | 1.53  |
| 1375130   | at | LOC679612+68740    | XM_001053736.1+XM_001078416.1 | 1.67  | 0.41  | 0.98  | 2.13  | 0.46  | 1.39  | 2.16  | 0.33  | 1.12  | 1.03  | 0.48  | 0.46  | 0.59  | 0.05  | 0.28  | 1.35  | 0.26  | 0.45  |
| 1375420   | at | Tip53i11_predicted | XM_001070488.1:XM_001070527.1 | -0.04 | -1.01 | -0.64 | -0.01 | -1.25 | -0.58 | 0.18  | -1.14 | -0.63 | 0.26  | -0.44 | -0.87 | 0.12  | 0.05  | -0.49 | 0.32  | -0.05 | 0.28  |
| 1375549   | at |                    | dbcAMP forskolin PACAP38      | 1.41  | 0.25  | 0.97  | 1.84  | 0.12  | 1.03  | 1.98  | 0.19  | 0.77  | -0.15 | 0.32  | 0.45  | 0.35  | 0.15  | -0.03 | -0.22 | 0.22  | -0.02 |
| 1375569   | at | Ccdc92             | NM_001083898.1                | 1.56  | 0.92  | 1.23  | 1.86  | 0.86  | 1.42  | 1.92  | 0.81  | 1.26  | 0.15  | 0.49  | 0.32  | 0.25  | 0.28  | 0.07  | 0.26  | 0.35  | 0.29  |
| 1375793   | at | Mil                | XM_001067729.1:XM_236194.4    | -1.28 | -0.50 | -0.03 | -1.62 | -0.34 | -0.01 | -1.43 | -0.30 | -0.43 | 0.10  | 0.48  | 0.07  | -0.22 | 0.02  | 0.30  | 0.23  | 0.20  | 0.18  |
| 1375824   | at |                    | dbcAMP forskolin PACAP38      | -0.44 | -0.43 | -1.10 | -0.51 | -0.32 | -1.09 | -0.46 | -0.32 | -1.08 | -0.10 | -0.17 | -0.78 | -0.27 | 0.19  | -0.62 | -0.13 | 0.02  | -0.40 |
| 1375877   | at |                    | dbcAMP forskolin PACAP38      | 1.36  | 0.90  | 0.95  | 1.77  | 1.13  | 1.24  | 1.84  | 0.62  | 1.00  | 0.09  | 0.69  | 1.22  | -0.04 | 0.24  | 1.21  | 0.58  | 0.61  | 0.64  |
| 1375989_a | at | Nkfb2              | NM_001008349.1                | 0.12  | 2.84  | 1.60  | 0.74  | 2.66  | 1.71  | 0.10  | 2.16  | 1.62  | 0.10  | 0.22  | -0.77 | -0.09 | 0.31  | -0.18 | -0.40 | 0.95  | -0.27 |
| 1376006   | at |                    | dbcAMP forskolin PACAP38      | 1.75  | 0.91  | 1.37  | 2.01  | 0.67  | 1.28  | 1.92  | 0.72  | 1.93  | 0.49  | -0.12 | 0.01  | 0.43  | 0.08  | 0.18  | 0.68  | 0.04  | 0.17  |
| 1376040   | at | Sipal12            | NM_001009704.1                | 1.80  | 0.34  | 0.65  | 2.15  | 0.08  | 0.57  | 2.36  | 0.05  | 0.63  | 0.64  | 0.02  | 0.46  | 0.38  | 0.15  | 0.08  | 1.98  | 0.69  | 0.38  |
| 1376144   | at | Parp9_predicted    | XM_001071222.1:XM_221404.4    | 1.67  | 0.99  | 1.39  | 1.70  | 1.24  | 1.49  | 1.47  | 0.96  | 1.15  | -0.58 | -1.60 | -1.00 | -0.37 | -0.88 | -0.28 | 2.17  | 0.90  | 1.70  |
| 1376160   | at |                    | dbcAMP forskolin PACAP38      | 0.18  | 2.95  | 2.22  | 0.24  | 3.27  | 2.69  | 0.29  | 3.01  | 2.39  | 1.17  | -0.25 | -0.26 | 0.16  | 0.02  | 0.00  | 0.69  | 1.76  | 0.55  |
| 1376177   | at | RGD1561062_pred    | NM_001081251.1+XM_573179.2    | -1.56 | 0.19  | 0.48  | -1.93 | 0.34  | 0.23  | -1.86 | 0.88  | 0.00  | -1.91 | -1.30 | -1.00 | -0.82 | -0.26 | -0.22 | -2.60 | -0.27 | -0.25 |
| 1376200   | at | MGC72974           | NM_198772.1                   | -1.53 | 0.47  | -0.55 | -1.82 | 0.37  | -0.96 | -1.51 | 0.54  | -0.26 | -1.68 | -0.56 | 0.32  | -0.48 | -0.25 | 0.12  | -1.55 | -0.07 | 0.47  |
| 1376204   | at |                    | dbcAMP forskolin PACAP38      | -0.54 | -1.37 | -0.87 | -0.68 | -1.39 | -0.84 | -0.71 | -1.22 | -0.54 | -0.08 | -0.42 | 1.47  | -0.05 | -0.26 | 0.68  | -0.32 | -0.11 | 1.24  |
| 1376275   | at |                    | dbcAMP forskolin PACAP38      | 1.94  | 1.23  | 1.36  | 2.44  | 1.09  | 1.74  | 3.33  | 1.13  | 1.97  | 1.29  | 0.34  | 0.37  | 0.69  | 0.00  | 0.05  | 1.15  | -0.07 | 0.09  |
| 1376350   | at |                    | dbcAMP forskolin PACAP38      | -0.17 | -1.53 | -0.90 | -0.45 | -1.56 | -0.95 | -0.35 | -1.21 | -0.83 | -0.16 | 0.16  | 0.47  | -0.12 | -0.30 | -0.35 | -0.15 | 0.12  | 0.17  |
| 1376395   | at |                    | dbcAMP forskolin PACAP38      | 1.12  | -0.36 | -0.39 | 1.38  | -0.49 | -0.22 | 1.55  | -0.56 | -0.10 | 0.03  | -0.82 | -0.79 | 0.02  | -0.23 | -0.23 | -0.02 | -0.75 | 0.43  |
| 1376440   | at | Rnf139_predicted   | XM_235338.4                   | 1.28  | 0.44  | 0.48  | 1.39  | 0.46  | 0.44  | 1.44  | 0.50  | 0.48  | 0.31  | -0.12 | 0.07  | 0.08  | -0.10 | 0.10  | 0.37  | -0.13 | 0.09  |
| 1376577   | at |                    | dbcAMP forskolin PACAP38      | 0.20  | -3.91 | -3.47 | 0.10  | -4.74 | -3.21 | 0.30  | -4.02 | -2.73 | 0.07  | -2.29 | -3.22 | -0.17 | -0.66 | -1.42 | -0.24 | -1.70 | -0.11 |
| 1376617   | at |                    | dbcAMP forskolin PACAP38      | -0.91 | -1.37 | -1.03 | -1.85 | -1.22 | -1.35 | -1.42 | -0.94 | -1.05 | -1.64 | -5.19 | -1.94 | -0.62 | -1.18 | -1.38 | -1.81 | -3.71 | -1.01 |
| 1376640   | at |                    | dbcAMP forskolin PACAP38      | 1.63  | 1.45  | 1.08  | 1.69  | 1.66  | 1.26  | 1.69  | 1.46  | 1.10  | -0.19 | 0.21  | 0.71  | -0.03 | 0.04  | 0.62  | -0.39 | -0.04 | 0.59  |
| 1376692   | at | Hipk2_predicted    | XM_001066598.1:XM_001066649.1 | -1.21 | -1.54 | -1.54 | -1.43 | -1.60 | -1.39 | -1.23 | -1.44 | -1.44 | -0.54 | -1.18 | -1.83 | -0.60 | -0.45 | -1.38 | -0.65 | -1.07 | -1.69 |
| 1376782   | at | Cdc14a_predicted   | XM_001073037.1:XM_001073065.1 | 1.51  | 0.50  | 0.50  | 1.73  | 0.48  | 0.29  | 1.73  | 0.44  | 0.66  | -0.60 | -1.20 | -1.00 | -0.56 | -0.49 | -0.43 | -0.71 | -1.09 | -0.08 |
| 1376788   | at | Dapk1_predicted    | XM_001060919.1+XM_225138.3    | 1.07  | 1.17  | 0.82  | 1.51  | 1.34  | 1.05  | 1.84  | 1.33  | 1.18  | 0.69  | 0.34  | 0.60  | 0.22  | 0.12  | 0.33  | 0.84  | 0.25  | 0.62  |
| 1376869   | at |                    | dbcAMP forskolin PACAP38      | -0.07 | -1.31 | -0.80 | -0.31 | -1.37 | -0.65 | -0.27 | -1.46 | -0.54 | -0.09 | -0.07 | 0.07  | 0.10  | 0.00  | 0.11  | -0.31 | -0.08 | 0.06  |
| 1376967   | at |                    | dbcAMP forskolin PACAP38      | 1.40  | 1.99  | 1.84  | 1.70  | 1.39  | 1.42  | 1.89  | 1.38  | 1.03  | 0.09  | 0.49  | 1.14  | 0.21  | -0.18 | 0.42  | 0.37  | -0.09 | 0.16  |
| 1377072   | at |                    | dbcAMP forskolin PACAP38      | -1.28 | -0.10 | -0.10 | -1.51 | -0.18 | -0.58 | -1.30 | -0.23 | -0.90 | -0.44 | 0.31  | -0.40 | -0.52 | -0.03 | -1.19 | -0.28 | 0.11  | -1.20 |
| 1377092   | at |                    | dbcAMP forskolin PACAP38      | -0.45 | -1.05 | -0.39 | -0.58 | -1.   |       |       |       |       |       |       |       |       |       |       |       |       |       |

|              |                  |                               |                          |       |       |       |       |       |       |       |       |       |       |       |       |       |       |       |       |       |       |
|--------------|------------------|-------------------------------|--------------------------|-------|-------|-------|-------|-------|-------|-------|-------|-------|-------|-------|-------|-------|-------|-------|-------|-------|-------|
| 1378414_at   |                  |                               | dbcAMP forskolin PACAP38 | 2.02  | 2.42  | 1.99  | 2.01  | 2.88  | 2.45  | 2.45  | 2.50  | 2.15  | 0.14  | -0.51 | 0.10  | 0.26  | -0.44 | -0.03 | 0.16  | -0.28 | 0.19  |
| 1378447_at   |                  |                               | dbcAMP forskolin PACAP38 | -1.01 | -0.17 | -0.39 | -1.37 | 0.08  | 0.51  | 1.53  | -0.10 | -0.38 | 1.42  | 0.08  | -0.36 | 0.53  | -0.05 | 0.14  | 1.27  | 0.00  | -0.24 |
| 1378500_at   |                  |                               | dbcAMP forskolin PACAP38 | 0.03  | 1.45  | 0.61  | -0.08 | 1.16  | 0.74  | 0.28  | 0.23  | 0.25  | 0.10  | 0.66  | -0.32 | 0.20  | -0.17 | -0.55 | 0.19  | 0.64  | 0.08  |
| 1378519_at   |                  |                               | dbcAMP forskolin PACAP38 | 1.37  | -0.66 | -0.63 | 1.63  | -0.29 | -0.01 | 1.95  | -0.85 | 0.11  | 1.66  | -0.64 | -0.64 | 0.59  | -0.20 | -0.05 | 1.43  | -0.31 | -0.37 |
| 1378801_at   |                  |                               | dbcAMP forskolin PACAP38 | -1.54 | -1.43 | -1.27 | -1.98 | -2.06 | -1.76 | -1.54 | -1.38 | -1.05 | 0.03  | -0.51 | -0.82 | 0.03  | 0.01  | -0.24 | -0.53 | -0.52 | -0.41 |
| 1378814_at   |                  |                               | dbcAMP forskolin PACAP38 | -1.87 | -0.32 | -0.97 | -2.19 | -0.17 | -0.88 | -1.18 | -0.49 | -1.33 | -1.51 | -0.91 | -0.84 | -0.76 | -0.47 | -1.10 | -1.89 | -0.62 | -0.88 |
| 1378871_at   | Bal2_predicted   | XM_001062170.1;XM_001062231.1 | dbcAMP forskolin PACAP38 | -0.26 | -1.43 | -0.55 | -0.32 | -1.77 | -1.00 | -0.23 | -1.72 | -0.81 | -0.38 | -1.95 | -0.79 | -0.29 | -0.49 | -0.19 | -0.53 | -1.47 | -0.23 |
| 1378899_at   |                  |                               | dbcAMP forskolin PACAP38 | -0.33 | -1.45 | -1.27 | -0.73 | -1.48 | -1.52 | 0.91  | -1.28 | -1.36 | 0.37  | -0.51 | -0.85 | 0.15  | -0.13 | -0.10 | -0.02 | -0.34 | 0.30  |
| 1378904_at   | LOC499587;LOC68  | XM_001061357.1;XM_001064323.1 | dbcAMP forskolin PACAP38 | 0.20  | 1.21  | 0.84  | 0.41  | 1.53  | 1.06  | 0.37  | 1.27  | 0.65  | -0.16 | 0.92  | 1.18  | -0.23 | 0.26  | 0.31  | 0.05  | 0.75  | 0.92  |
| 1378925_at   |                  |                               | dbcAMP forskolin PACAP38 | 5.78  | 3.47  | 3.90  | 6.10  | 3.60  | 4.22  | 6.08  | 3.23  | 3.89  | -0.39 | 0.07  | 0.13  | -0.05 | -0.34 | 0.01  | 0.91  | 0.77  | 1.45  |
| 1378993_at   |                  |                               | dbcAMP forskolin PACAP38 | -1.31 | -0.59 | -0.92 | -1.36 | -0.73 | -0.76 | -1.19 | -0.78 | -0.53 | -0.20 | -0.10 | -0.28 | -0.07 | 0.17  | -0.26 | 0.22  | -0.06 | -0.49 |
| 1379001_at   |                  |                               | dbcAMP forskolin PACAP38 | 1.21  | 0.19  | 0.00  | 1.44  | 0.12  | 0.21  | 1.48  | 0.23  | 0.39  | 1.13  | -0.30 | -0.60 | 0.39  | -0.17 | -0.29 | 0.90  | -0.27 | -0.13 |
| 1379049_a_at |                  |                               | dbcAMP forskolin PACAP38 | -1.07 | 0.01  | -0.49 | -1.60 | 0.21  | -0.54 | -1.16 | -0.41 | -0.35 | -1.34 | -1.41 | -0.51 | -0.61 | -1.22 | -0.87 | -1.15 | -1.30 | -0.24 |
| 1379051_at   |                  |                               | dbcAMP forskolin PACAP38 | 1.53  | -0.18 | 0.24  | 1.06  | 0.07  | 0.76  | 1.22  | 0.09  | 0.60  | 0.76  | 0.48  | 0.07  | 0.38  | -0.03 | 0.02  | 0.74  | 0.57  | 0.01  |
| 1379126_at   |                  |                               | dbcAMP forskolin PACAP38 | 0.38  | 2.01  | 1.98  | 0.73  | 1.90  | 1.59  | 0.85  | 1.62  | 1.16  | 0.08  | 1.01  | 1.58  | 0.48  | 0.21  | 0.47  | 1.25  | 1.25  | 1.69  |
| 1379196_at   | RGD1566420_pred  | XM_001075450.1;XM_574226.2    | dbcAMP forskolin PACAP38 | -1.18 | -0.96 | 0.19  | -1.58 | -0.02 | -1.12 | -1.45 | -0.56 | 0.31  | -1.20 | -0.75 | 0.20  | -0.42 | -0.44 | -0.14 | -0.94 | -0.25 | 0.33  |
| 1379238_at   | Ctdspl_predicted | XM_001077330.1;XM_217293.4    | dbcAMP forskolin PACAP38 | -0.95 | -1.44 | -0.71 | -1.55 | -1.07 | -0.71 | -1.05 | -1.02 | -1.02 | -0.28 | -1.01 | -0.37 | -0.33 | -0.31 | -0.27 | -0.59 | -0.96 | -0.77 |
| 1379270_at   |                  |                               | dbcAMP forskolin PACAP38 | -1.07 | 0.07  | -0.31 | -1.85 | -0.06 | -0.17 | -1.11 | -0.28 | -0.33 | -1.09 | -0.35 | 0.15  | -0.62 | -0.19 | -0.20 | -1.04 | -0.25 | 0.18  |
| 1379294_at   |                  |                               | dbcAMP forskolin PACAP38 | 1.27  | 0.48  | 0.28  | 1.37  | 0.82  | 0.83  | 1.40  | 0.29  | 0.69  | -0.17 | 0.15  | 0.33  | -0.07 | 0.35  | 0.22  | -0.28 | -0.11 | -0.31 |
| 1379315_at   | Rassf7_predicted | XM_001060465.1;XM_215119.4    | dbcAMP forskolin PACAP38 | -0.54 | -1.37 | -1.55 | -1.16 | -1.45 | -1.64 | -0.87 | -1.34 | -1.39 | -0.30 | -1.40 | -1.73 | -0.04 | -0.54 | 0.90  | -0.45 | -1.01 | -0.32 |
| 1379333_at   | Armcx6           | NM_001007757.1                | dbcAMP forskolin PACAP38 | -1.41 | -0.58 | -0.33 | -1.94 | -1.15 | -0.57 | -2.13 | -1.24 | -0.73 | -0.94 | -1.21 | -0.69 | -0.25 | -0.48 | -0.20 | -1.33 | -0.65 | -0.35 |
| 1379352_at   | Pip5k1a          | NM_001012743.1                | dbcAMP forskolin PACAP38 | 1.42  | 0.49  | 0.73  | 1.21  | 0.43  | -0.28 | 1.65  | 0.36  | 0.65  | 0.22  | 0.46  | 0.58  | -0.23 | -0.14 | 0.20  | 0.11  | -0.18 | 0.22  |
| 1379451_at   |                  |                               | dbcAMP forskolin PACAP38 | -0.40 | -1.68 | -1.52 | -1.03 | -1.45 | -1.22 | -0.80 | -1.79 | -1.24 | -0.40 | -1.94 | -0.86 | -0.05 | -0.72 | -0.41 | -0.61 | -0.87 | 0.05  |
| 1379463_at   | Filip1           | NM_145682.1                   | dbcAMP forskolin PACAP38 | 0.67  | 1.66  | 1.80  | 0.88  | 1.79  | 0.92  | 1.19  | 1.31  | 1.04  | -0.04 | -0.16 | -0.02 | 0.00  | -0.12 | 0.00  | -0.05 | -0.17 | 0.00  |
| 1379492_at   |                  |                               | dbcAMP forskolin PACAP38 | 0.31  | -1.50 | -1.63 | -0.32 | -1.84 | -2.12 | -1.09 | -1.35 | -1.42 | -0.18 | -1.47 | -1.67 | -0.15 | -0.76 | -0.53 | -0.64 | -0.46 | 0.32  |
| 1379565_at   | Creb3l2          | NM_001021288.1                | dbcAMP forskolin PACAP38 | 3.63  | 2.54  | 2.22  | 4.44  | 2.74  | 2.56  | 4.40  | 2.43  | 2.57  | 3.70  | 1.78  | 0.06  | 0.80  | 0.09  | 0.52  | 1.90  | -0.21 | 0.13  |
| 1379581_at   |                  |                               | dbcAMP forskolin PACAP38 | 1.65  | 3.34  | 2.43  | 1.46  | 3.23  | 2.51  | 1.24  | 2.78  | 2.17  | -0.27 | 0.56  | 1.22  | 0.18  | 0.08  | 0.78  | 0.02  | 0.34  | 0.29  |
| 1379590_at   | LOC498425        | NM_001017504.1                | dbcAMP forskolin PACAP38 | 2.14  | 0.77  | 0.94  | 2.51  | 0.72  | 0.99  | 2.52  | 0.58  | 0.82  | 0.35  | -0.04 | 0.32  | 0.39  | -0.10 | 0.24  | 0.22  | -0.65 | -0.12 |
| 1379607_at   |                  |                               | dbcAMP forskolin PACAP38 | 3.51  | 5.04  | 3.39  | 4.53  | 5.35  | 4.08  | 4.70  | 4.75  | 3.81  | -0.20 | -0.38 | -0.27 | -0.25 | -0.28 | -0.78 | -0.10 | -0.38 | 0.99  |
| 1379617_at   |                  |                               | dbcAMP forskolin PACAP38 | 1.66  | 0.69  | 0.39  | 1.44  | 1.00  | 0.80  | 1.77  | 0.83  | 0.66  | 1.02  | 0.79  | 1.11  | 0.77  | 0.09  | 0.74  | 1.26  | 0.18  | 0.22  |
| 1379621_at   | MGC108974        | NM_001017513.1                | dbcAMP forskolin PACAP38 | -1.10 | 0.30  | 0.29  | -1.48 | 0.62  | 0.26  | -1.04 | 0.74  | -0.01 | -0.19 | 0.43  | 0.24  | 0.11  | 0.04  | 0.09  | -0.67 | 0.00  | 0.15  |
| 1379625_at   |                  |                               | dbcAMP forskolin PACAP38 | 1.10  | 1.87  | 2.13  | 1.16  | 1.45  | 1.30  | 1.12  | 1.12  | 1.07  | 0.17  | 0.75  | 0.95  | 0.21  | 0.56  | 0.91  | 0.22  | 0.51  | 0.38  |
| 1379799_at   |                  |                               | dbcAMP forskolin PACAP38 | 0.29  | -1.19 | -1.20 | -0.08 | -1.43 | -0.93 | 0.17  | -1.71 | -0.83 | 1.01  | -2.91 | -2.06 | -0.12 | -0.54 | -0.67 | 0.51  | -1.40 | 0.59  |
| 1379817_at   | Purg_predicted   | XM_001068166.1;XM_341448.3    | dbcAMP forskolin PACAP38 | -1.00 | -0.29 | -0.55 | -1.52 | -0.12 | -0.65 | -1.05 | -0.25 | -0.53 | 0.08  | -0.41 | -0.03 | -0.22 | -0.34 | -0.04 | 0.19  | -0.34 | 0.07  |
| 1379910_at   | RGD1561967_pred  | XM_001072323.1;XM_573497.2    | dbcAMP forskolin PACAP38 | 1.28  | 0.00  | 0.72  | 1.78  | -0.04 | 0.85  | 2.30  | -0.36 | 0.80  | 0.04  | -0.45 | -0.19 | 0.14  | 0.07  | 0.14  | 0.02  | -0.37 | 0.18  |
| 1379911_at   | Dapk1_predicted  | XM_001060919.1;XM_225138.3    | dbcAMP forskolin PACAP38 | 1.03  | 0.96  | 0.99  | 1.46  | 0.77  | 1.30  | 2.01  | 0.92  | 0.96  | 0.69  | 0.65  | 0.36  | 0.10  | 0.01  | -0.13 | 0.90  | 0.34  | 0.21  |
| 1379970_at   | RGD1560587_pred  | XM_244186.4;XR_007714.1       | dbcAMP forskolin PACAP38 | -1.01 | -1.36 | -1.06 | -1.99 | -1.62 | -1.60 | -1.69 | -1.43 | -1.18 | 0.50  | -1.23 | -1.58 | 0.14  | -0.42 | -0.70 | 0.29  | -1.15 | -1.17 |
| 1379982_at   |                  |                               | dbcAMP forskolin PACAP38 | 1.14  | 1.26  | 1.97  | 1.50  | 1.07  | 1.89  | 1.60  | 0.85  | 1.70  | 0.52  | -0.22 | 0.39  | -0.21 | -0.36 | 0.09  | 1.90  | 1.17  | 1.67  |
| 1380064_at   |                  |                               | dbcAMP forskolin PACAP38 | -0.83 | -2.26 | -1.86 | -1.31 | -2.13 | -2.45 | -1.29 | -2.09 | -1.83 | -0.07 | -1.93 | -1.89 | -0.12 | -0.68 | -1.28 | -0.22 | -1.49 | -0.79 |
| 1380230_at   |                  |                               | dbcAMP forskolin PACAP38 | 1.06  | 1.32  | 0.68  | 1.06  | 1.35  | 0.98  | 1.22  | 1.14  | 0.93  | 1.49  | 0.56  | -0.55 | 0.64  | 0.67  | 0.21  | 1.40  | 0.24  | -0.13 |
| 1380297_at   |                  |                               | dbcAMP forskolin PACAP38 | 0.02  | 1.25  | 1.40  | 0.20  | 1.22  | 0.85  | -0.18 | 1.21  | 1.23  | -0.49 | 0.32  | 0.40  | -0.38 | 0.38  | -0.16 | -0.17 | -0.01 | 0.23  |
| 1380365_at   |                  |                               | dbcAMP forskolin PACAP38 | 2.83  | 1.44  | 1.47  | 3.50  | 1.17  | 1.81  | 3.65  | 1.08  | 1.77  | 1.51  | 0.93  | 1.49  | 0.56  | 0.21  | 1.04  | 1.42  | 0.81  | 1.54  |
| 1380383_at   | Arf4l_predicted  | XM_001081491.1;XM_220933.3    | dbcAMP forskolin PACAP38 | 1.60  | 1.55  | 1.19  | 1.69  | 1.54  | 1.55  | 2.04  | 1.44  | 1.31  | -1.80 | -2.99 | -2.91 | -0.55 | -0.51 | -1.01 | -3.59 | -2.57 | -1.55 |
| 1380459_at   | Bbd14a           | XM_001058289.1;XM_001074461.1 | dbcAMP forskolin PACAP38 | -2.05 | -0.49 | -0.86 | -2.20 | -0.68 | -1.48 | -2.06 | -0.73 | -1.12 | -1.28 | -0.65 | -0.57 | -0.91 | -0.67 | -0.55 | -1.23 | -0.55 | -0.71 |
| 1380688_at   | LOC684841        | XM_001072155.1                | dbcAMP forskolin PACAP38 | -0.36 | -4.35 | -2.04 | -0.40 | -4.61 | -2.23 | -0.05 | -4.10 | -1.71 | 0.28  | -2.16 | -0.52 | 0.19  | -0.26 | 0.16  | 0.21  | -1.55 | 0.04  |
| 1380695_at   |                  |                               | dbcAMP forskolin PACAP38 | 1.46  | 0.56  | 0.13  | 1.99  | 0.72  | 0.39  | 1.88  | 0.31  | 0.37  | -0.29 | -0.75 | -1.23 | -0.10 | -0.02 | -0.43 | -0.59 | -0.75 | -0.69 |
| 1380937_at   |                  |                               | dbcAMP forskolin PACAP38 | -1.32 | -0.31 | -0.19 | -1.45 | -1.02 | -0.53 | -1.34 | 0.06  | -0.69 | -1.35 | -1.01 | 0.18  | -0.52 | -0.25 | -0.15 | -1.87 | -0.33 | 0.20  |
| 1381070_at   |                  |                               | dbcAMP forskolin PACAP38 | 0.77  | 1.74  | 0.31  | 1.73  | 1.09  | 0.34  | 2.69  | 1.17  | 0.63  | 0.16  | 1.07  | 1.05  | 0.22  | 0.12  | 0.83  | 0.96  | 0.47  | 0.29  |
| 1381103_a_at | RGD1562579_pred  | NM_001008291.1;XM_001080556.1 | dbcAMP forskolin PACAP38 | 1.59  | 0.65  | 0.56  | 2.13  | 0.50  | 0.77  | 1.90  | 0.58  | 0.72  | 0.41  | 0.16  | -0.19 | 0.19  | 0.07  | -0.05 | 0.27  | 0.08  | 0.24  |
| 1381333_at   |                  |                               | dbcAMP forskolin PACAP38 | 2.29  | -0.09 | 0.25  | 2.53  | -0.13 | 0.51  | 3.19  | -0.05 | 0.48  | -0.06 | 0.04  | -0.77 | -0.09 | -0.05 | -0.53 | -0.11 | -0.09 | 0.61  |
| 1381390_at   | RGD1564833_pred  | XM_001060344.1;XM_573525.2    | dbcAMP forskolin PACAP38 | 1.01  | 0.40  | 0.23  | 1.26  | 0.43  | 0.21  | 1.46  | 0.52  | 0.46  | 0.36  | -0.27 | -0.42 | 0.48  | 0.17  | 0.09  | 0.35  | -0.04 | -0.04 |
| 1381428_a_at |                  |                               | dbcAMP forskolin PACAP38 | -0.38 | -1.88 | -0.79 | -0.86 | -1.89 | 0.26  | -0.54 | -1.56 | -0.53 | 0.14  | -0.95 | -0.23 | -0.12 | -0.30 | 0.13  | -0.15 | -0.93 | -0.06 |
| 1381619_at   |                  |                               | dbcAMP forskolin PACAP38 | -1.18 | -0.58 | 0.59  | -1.17 | -0.21 | -0.34 | -1.08 | 0.13  | 0.09  | -0.96 | -0.17 | -0.25 | -0.46 | -0.09 | -0.21 | -0.65 | -0.40 | -0.09 |
| 1381655_at   |                  |                               | dbcAMP forskolin PACAP38 | -2.39 | -2.23 | -2.48 | -2.60 | -2.05 | -2.59 | -3.17 | -2.23 | -2.91 | -0.44 | -1.75 | -2.04 | -0.57 | -0.66 | -1.32 | -0.68 | -1.17 | -0.57 |
| 1381811_at   |                  |                               | dbcAMP forskolin PACAP38 | 1.94  | 0.44  | 0.98  | 2.17  | 0.36  | 0.89  | 2.52  | 0.43  | 1.22  | 0.10  | 0.37  | 0.83  | 0.60  | 0.34  | 0.90  | -0.31 | 0.40  | 0.78  |
| 1381975_at   |                  |                               | dbcAMP forskolin PACAP38 | 0.28  | 1.74  | 1.39  | 0.63  | 1.77  | 1.23  | 0.74  | 1.48  | 1.03  | 0.12  | 1.01  | 1.61  | -0.31 | 0.29  | 0.77  | 1.26  | 1.16  | 1.82  |
| 1381988_at   |                  |                               | dbcAMP forskolin PACAP38 | 0.98  | 1.23  | 0.90  | 1.08  | 1.32  | 0.97  | 1.13  | 0.94  | 0.73  | 0.10  | 0.26  | 0.57  | 0.08  | 0.19  | 0.39  | 0.13  | 0.27  | 0.55  |
| 1382017_at   |                  |                               | dbcAMP forskolin PACAP38 | 2.61  | 3.65  | 3.60  | 3.23  | 3.26  | 3.10  | 2.87  | 2.49  | 2.85  | 0.74  | 0.33  | 1.04  | 0.35  | -0.48 | 0.42  | 1.11  | 0.02  | 2.12  |
| 1382163_at   |                  |                               | dbcAMP forskolin PACAP38 | -1.53 | -1.20 | -1.24 | -1.88 | -1.61 |       |       |       |       |       |       |       |       |       |       |       |       |       |

|              |                   |                               |                          |       |       |       |       |       |       |       |       |       |       |       |       |       |       |       |       |       |       |
|--------------|-------------------|-------------------------------|--------------------------|-------|-------|-------|-------|-------|-------|-------|-------|-------|-------|-------|-------|-------|-------|-------|-------|-------|-------|
| 1383382_at   | LOC681740         | XM_001056690.1:XM_001056762.1 | dbcAMP forskolin PACAP38 | 1.46  | 0.63  | 0.54  | 1.93  | 0.41  | 0.59  | 2.19  | 0.34  | 0.58  | 1.24  | 1.25  | 0.80  | 0.11  | 0.16  | 0.44  | 1.36  | 0.28  | 0.39  |
| 1383401_at   | LOC500040         | NM_001039344.2                | dbcAMP forskolin PACAP38 | 0.86  | 1.93  | 0.90  | 1.16  | 0.66  | 0.90  | 1.46  | 0.98  | 1.16  | 0.39  | 0.94  | 1.24  | 0.18  | 0.03  | 0.53  | 0.62  | 0.58  | 0.77  |
| 1383527_at   |                   |                               | dbcAMP forskolin PACAP38 | -1.39 | 0.04  | -0.24 | -1.97 | -0.15 | -0.56 | -1.93 | -0.13 | -0.48 | 0.64  | 0.06  | -0.16 | -0.15 | -0.16 | 0.20  | 0.63  | -0.32 | -0.15 |
| 1383589_at   | Pgrmc2            | NM_001008374.1                | dbcAMP forskolin PACAP38 | -1.26 | -1.62 | -0.86 | -0.98 | -1.71 | -1.18 | -1.15 | -1.68 | -0.90 | 1.23  | 0.08  | 1.86  | 0.24  | -0.63 | 0.00  | 2.02  | -0.04 | 1.43  |
| 1383690_at   | LOC366473         | NM_001014261.1:XM_001060961.1 | dbcAMP forskolin PACAP38 | 0.57  | 1.27  | 1.22  | 0.33  | 1.20  | 1.33  | 0.34  | 0.80  | 1.11  | -0.23 | 0.98  | 1.05  | 0.05  | 0.14  | 0.54  | 0.06  | 1.67  | 0.94  |
| 1383737_at   |                   |                               | dbcAMP forskolin PACAP38 | 1.62  | 1.76  | 1.41  | 2.18  | 1.63  | 1.42  | 2.11  | 1.03  | 1.01  | 0.24  | 0.45  | 0.29  | 0.01  | 0.02  | 0.03  | 0.04  | 0.17  | 0.12  |
| 1383743_at   | Lrrrc16_predicted | XM_001070748.1:XM_225336.4    | dbcAMP forskolin PACAP38 | 0.20  | 1.27  | 1.56  | 0.11  | 1.32  | 1.41  | 0.18  | 1.02  | 1.29  | 0.03  | 0.20  | 0.17  | -0.04 | 0.03  | 0.03  | 0.08  | -0.01 | -0.18 |
| 1383767_at   |                   |                               | dbcAMP forskolin PACAP38 | -0.27 | -1.34 | -2.23 | -0.82 | -1.82 | -2.21 | -0.83 | -1.20 | -1.71 | -0.62 | -3.31 | -2.54 | -0.68 | -1.07 | -2.12 | -0.74 | -2.32 | -2.05 |
| 1383791_at   | RGD1566155_pred   | XM_001067193.1:XM_577054.2    | dbcAMP forskolin PACAP38 | 1.93  | 2.93  | 1.66  | 2.65  | 2.77  | 2.03  | 2.90  | 2.23  | 1.94  | 0.87  | 0.39  | 0.40  | 0.48  | 0.09  | 0.68  | 1.78  | 2.17  | 1.59  |
| 1383817_at   |                   |                               | dbcAMP forskolin PACAP38 | 1.73  | 0.25  | 0.32  | 1.68  | 0.21  | 0.51  | 1.83  | 0.15  | 0.63  | 0.61  | 0.13  | -0.06 | 0.00  | 0.12  | 0.06  | 0.30  | -0.22 | 0.00  |
| 1383905_at   | Zlp216_predicted  | XM_001079764.1:XM_215251.4    | dbcAMP forskolin PACAP38 | 1.26  | 0.35  | 0.39  | 1.47  | 0.40  | 0.95  | 1.59  | 0.27  | 0.75  | 0.59  | 0.25  | 0.00  | 0.06  | 0.02  | -0.01 | 0.75  | 0.08  | 0.23  |
| 1383954_at   |                   |                               | dbcAMP forskolin PACAP38 | -0.56 | -0.47 | -1.27 | -0.93 | -0.03 | -1.20 | -1.32 | 0.05  | -0.74 | -1.20 | -0.86 | -0.29 | -0.50 | 0.17  | 0.03  | -1.25 | 0.28  | 0.45  |
| 1384000_at   | Sox4_predicted    | XM_001068302.1:XM_344594.3    | dbcAMP forskolin PACAP38 | 1.76  | 1.43  | 1.49  | 1.83  | 1.44  | 1.99  | 2.06  | 1.38  | 1.72  | 1.47  | 1.56  | 2.37  | 0.41  | 0.61  | 0.97  | 1.74  | 2.42  | 1.41  |
| 1384026_at   |                   |                               | dbcAMP forskolin PACAP38 | 1.59  | 0.44  | 0.96  | 1.84  | 0.28  | 0.76  | 2.01  | 0.65  | 1.79  | 1.32  | 0.57  | 0.28  | 0.72  | 0.64  | 0.33  | 1.39  | 0.52  | 0.43  |
| 1384039_at   | Rnf125_predicted  | XM_001054760.1:XM_341581.3    | dbcAMP forskolin PACAP38 | -0.75 | -1.49 | 0.70  | -0.96 | 1.59  | 0.56  | -0.66 | 1.39  | 0.60  | -0.51 | 0.11  | 1.29  | 0.01  | 0.34  | 1.04  | 0.94  | 0.51  | 0.91  |
| 1384135_at   |                   |                               | dbcAMP forskolin PACAP38 | -1.01 | -0.19 | -0.11 | -1.30 | 0.15  | -0.48 | -1.60 | 0.02  | -0.42 | -1.26 | -0.66 | 0.06  | -0.62 | -0.43 | -0.03 | 1.40  | -0.15 | 0.18  |
| 1384163_at   |                   |                               | dbcAMP forskolin PACAP38 | -1.14 | -0.49 | -0.04 | -1.41 | -0.52 | -0.15 | -1.44 | -0.35 | 0.05  | -1.16 | -0.67 | 0.81  | -0.32 | -0.57 | 0.07  | -1.34 | -0.51 | 0.10  |
| 1384170_at   | Vav2_predicted    | XM_001075315.1:XM_001075347.1 | dbcAMP forskolin PACAP38 | 1.35  | 0.56  | 1.65  | 1.45  | 0.25  | 1.51  | 1.39  | -0.08 | 1.32  | -0.11 | -0.69 | -1.08 | 0.09  | -0.23 | -0.68 | -0.17 | -0.53 | -0.88 |
| 1384171_x_at | Vav2_predicted    | XM_001075315.1:XM_001075347.1 | dbcAMP forskolin PACAP38 | 0.95  | 0.36  | 1.48  | 1.14  | 0.22  | 1.39  | 1.06  | -0.11 | 1.21  | -0.16 | -0.71 | -0.84 | 0.05  | -0.02 | -0.45 | -0.32 | -0.35 | -0.60 |
| 1384210_at   | RSB-11-77         | NM_182669.2                   | dbcAMP forskolin PACAP38 | 0.73  | 1.30  | 0.84  | 1.17  | 0.44  | 1.00  | 1.57  | 1.10  | 0.20  | 0.03  | -0.15 | -0.96 | 0.24  | 0.51  | -0.09 | 0.37  | 0.09  | 0.42  |
| 1384308_at   | LOC686117+67940   | XM_001054906.1:XM_001070244.1 | dbcAMP forskolin PACAP38 | 1.32  | 1.54  | 1.03  | 1.56  | 1.01  | 0.71  | 1.58  | 0.62  | 0.53  | 0.46  | 0.52  | 0.32  | 0.05  | 0.29  | 0.28  | 0.89  | 0.47  | -0.05 |
| 1384315_at   | Pdk3              | XM_001056460.1:XM_216091.3    | dbcAMP forskolin PACAP38 | 1.08  | 3.15  | 2.53  | 1.41  | 3.33  | 2.79  | 1.55  | 3.31  | 2.67  | 0.06  | 0.15  | 0.28  | 0.05  | -0.04 | 0.20  | 0.01  | -0.23 | -0.03 |
| 1384390_at   | LOC681740         | XM_001056690.1:XM_001056762.1 | dbcAMP forskolin PACAP38 | 1.55  | 0.75  | 1.05  | 2.19  | 0.52  | 1.12  | 2.48  | 0.34  | 0.94  | 1.37  | 1.32  | 0.59  | 0.06  | 0.19  | 0.11  | 1.70  | 0.42  | -0.05 |
| 1384420_at   |                   |                               | dbcAMP forskolin PACAP38 | -0.21 | -2.33 | -1.47 | -0.66 | -2.73 | -2.09 | -0.58 | -2.05 | -1.37 | -0.89 | -2.20 | -2.04 | -0.58 | -1.00 | -0.89 | -1.44 | -0.52 | -0.18 |
| 1384486_at   |                   |                               | dbcAMP forskolin PACAP38 | 1.26  | 0.11  | 0.14  | 1.46  | 0.11  | 0.34  | 1.03  | 0.09  | 0.37  | -0.20 | 0.18  | 0.05  | 0.13  | -0.25 | 0.03  | -0.40 | 0.14  | 0.12  |
| 1384506_at   | Unc5c             | NM_199407.1                   | dbcAMP forskolin PACAP38 | -0.48 | -1.55 | -0.88 | -1.01 | -1.95 | -1.37 | -0.98 | -1.69 | -1.05 | 0.18  | 0.64  | 0.57  | 0.14  | 0.07  | 0.45  | 0.18  | 0.75  | -0.10 |
| 1384516_at   |                   |                               | dbcAMP forskolin PACAP38 | -1.99 | -0.48 | -0.59 | 1.51  | 0.07  | 0.07  | 1.83  | 0.12  | 0.29  | 1.79  | -0.04 | -0.64 | 0.59  | -0.43 | 0.02  | 1.39  | 0.52  | -0.29 |
| 1384643_at   |                   |                               | dbcAMP forskolin PACAP38 | -1.84 | 0.46  | -0.37 | -2.02 | 0.61  | -0.71 | -2.11 | 0.51  | -0.89 | -1.58 | 0.28  | 0.62  | -0.41 | 0.34  | 0.31  | -1.32 | 0.16  | -0.29 |
| 1384683_at   |                   |                               | dbcAMP forskolin PACAP38 | 1.23  | 0.25  | 0.77  | 1.39  | 0.24  | 0.88  | 1.33  | 0.22  | 0.82  | 0.82  | -0.20 | 0.07  | 0.00  | -0.17 | 0.08  | 0.04  | -0.55 | -0.06 |
| 1384728_at   | Ches1_predicted   | XM_001065012.1:XM_001065063.1 | dbcAMP forskolin PACAP38 | 1.17  | 0.69  | 1.24  | 1.39  | 0.32  | 1.21  | 1.36  | 0.39  | 0.93  | -0.07 | -0.34 | -0.39 | 0.19  | 0.03  | -0.49 | 0.22  | -0.12 | -0.58 |
| 1384765_at   |                   |                               | dbcAMP forskolin PACAP38 | -0.13 | 2.22  | 1.38  | -0.57 | 1.96  | 1.71  | -0.40 | 1.06  | 1.02  | 0.42  | -0.16 | 0.23  | -0.05 | -0.10 | 0.32  | 0.11  | 0.42  | 0.33  |
| 1384791_at   | B3gnt1_predicted  | XM_001061345.1:XM_223674.3    | dbcAMP forskolin PACAP38 | 2.31  | 0.80  | 1.89  | 2.27  | 0.51  | 1.51  | 2.38  | 0.47  | 1.32  | 0.50  | 0.05  | -2.03 | 0.03  | -0.06 | -0.49 | 0.18  | -0.46 | -0.95 |
| 1384866_at   | Entpd3            | NM_178106.2                   | dbcAMP forskolin PACAP38 | 0.10  | 1.17  | 1.05  | -0.13 | 1.06  | 1.13  | 0.15  | 1.02  | 1.06  | -0.01 | 1.69  | 2.38  | 0.12  | 0.86  | 1.35  | 0.01  | 0.11  | 0.20  |
| 1385164_at   |                   |                               | dbcAMP forskolin PACAP38 | -2.14 | -0.92 | -1.59 | -2.36 | -0.98 | -1.34 | -2.28 | -1.25 | -1.32 | -0.47 | -0.16 | -0.68 | -0.10 | -0.03 | -0.32 | -0.18 | -0.03 | -0.66 |
| 1385173_at   | Ebf3_predicted    | XM_001056705.1:XM_341951.3    | dbcAMP forskolin PACAP38 | 3.69  | -1.22 | 0.10  | 3.61  | -0.64 | 0.75  | 3.59  | -0.98 | 0.09  | -0.61 | 0.06  | 0.94  | 0.57  | 0.12  | 0.46  | -0.90 | -0.72 | -0.67 |
| 1385296_at   | Trmt12            | XM_001068980.1:XM_235337.3    | dbcAMP forskolin PACAP38 | 1.38  | 0.61  | 0.31  | 1.49  | 0.72  | 0.53  | 1.53  | 0.60  | 0.49  | 0.31  | 0.04  | 0.17  | -0.06 | -0.25 | 0.28  | 0.34  | -0.02 | 0.45  |
| 1385332_at   | Dus4l_predicted   | XM_001076117.1:XM_345654.3    | dbcAMP forskolin PACAP38 | 1.38  | -1.11 | 0.11  | 1.65  | -0.18 | 0.33  | 1.71  | -0.21 | 0.55  | -0.34 | 0.81  | 0.15  | -0.22 | -0.48 | 0.30  | 0.03  | -0.53 | 0.09  |
| 1385381_at   |                   |                               | dbcAMP forskolin PACAP38 | 3.00  | 4.02  | 2.87  | 3.92  | 4.15  | 3.02  | 3.90  | 3.86  | 2.78  | -0.21 | -0.02 | -0.09 | -0.33 | 0.06  | -0.16 | -0.50 | 0.01  | 0.98  |
| 1385506_at   |                   |                               | dbcAMP forskolin PACAP38 | -1.11 | -1.02 | -1.84 | -2.30 | -1.37 | -1.59 | -1.32 | -1.29 | -0.94 | -0.29 | -0.18 | -0.36 | 0.22  | 0.43  | -0.19 | -0.84 | -0.57 | -0.55 |
| 1385706_at   | LOC500040         | NM_001039344.2                | dbcAMP forskolin PACAP38 | -1.07 | -1.44 | -1.15 | -1.86 | 0.87  | 0.76  | 1.83  | 1.04  | 1.39  | 0.66  | -1.19 | -1.63 | 0.14  | -0.46 | 0.56  | 1.01  | 1.39  | 1.45  |
| 1385739_at   |                   |                               | dbcAMP forskolin PACAP38 | -0.67 | -1.33 | -1.26 | -0.88 | -0.97 | -1.20 | -0.89 | -1.03 | -1.11 | -0.34 | -1.44 | -1.23 | -0.24 | 0.61  | -0.62 | -0.36 | -1.11 | -0.92 |
| 1385887_at   |                   |                               | dbcAMP forskolin PACAP38 | 0.41  | -1.05 | -1.04 | -0.36 | -1.82 | -0.67 | 0.30  | -1.49 | -0.69 | 0.53  | -0.29 | -0.12 | 0.23  | -0.26 | 0.06  | 0.12  | -0.45 | -0.03 |
| 1385901_at   |                   |                               | dbcAMP forskolin PACAP38 | -0.60 | -0.29 | -1.21 | -1.22 | 0.45  | -1.18 | -1.25 | 0.27  | -0.85 | -0.80 | -1.19 | -0.15 | -0.05 | -0.58 | -0.03 | -0.88 | -0.68 | 0.09  |
| 1385986_at   |                   |                               | dbcAMP forskolin PACAP38 | -1.19 | -0.23 | -0.77 | -1.07 | -0.28 | -0.77 | -1.84 | -0.27 | -0.76 | -0.51 | -0.64 | -0.38 | -0.45 | -0.26 | -0.95 | -0.23 | -0.36 | -0.11 |
| 1386059_at   |                   |                               | dbcAMP forskolin PACAP38 | -0.64 | -1.41 | -1.60 | -1.07 | -0.88 | -1.31 | -1.03 | -0.75 | -0.92 | -0.35 | -0.35 | -0.48 | -0.16 | 0.20  | 0.04  | -0.46 | 0.24  | -0.17 |
| 1386076_at   |                   |                               | dbcAMP forskolin PACAP38 | 1.45  | 0.23  | 0.58  | 2.01  | -0.40 | 0.39  | 2.48  | -0.10 | 0.75  | 1.43  | -0.35 | -0.33 | 0.82  | -0.34 | -0.22 | 1.20  | -0.53 | -0.41 |
| 1386102_at   |                   |                               | dbcAMP forskolin PACAP38 | -1.28 | -0.54 | -0.72 | -1.44 | -0.18 | -0.94 | -1.28 | -0.39 | -1.24 | -0.48 | -1.35 | -0.86 | -0.46 | -0.75 | -0.84 | -0.29 | -0.96 | -0.75 |
| 1386123_at   |                   |                               | dbcAMP forskolin PACAP38 | -0.20 | -1.30 | -0.81 | -0.69 | -1.41 | -1.09 | -0.85 | -1.02 | -0.81 | 0.49  | 0.38  | 0.59  | 0.22  | 0.39  | 0.91  | 0.17  | -0.28 | -0.55 |
| 1386149_at   |                   |                               | dbcAMP forskolin PACAP38 | 1.66  | 0.51  | 0.89  | 1.59  | 0.87  | 0.94  | 1.85  | 0.47  | 1.02  | -0.51 | -0.63 | 0.21  | -0.05 | -0.12 | 0.10  | -0.61 | -0.88 | -0.12 |
| 1386152_at   |                   |                               | dbcAMP forskolin PACAP38 | 4.75  | 0.02  | 1.85  | 5.45  | 0.14  | 2.75  | 5.05  | 0.04  | 2.16  | 0.06  | -0.01 | -0.01 | 0.06  | -0.01 | -0.01 | 0.06  | -0.03 | -0.02 |
| 1386472_at   |                   |                               | dbcAMP forskolin PACAP38 | 0.07  | -1.43 | -1.17 | 0.03  | -1.58 | -1.20 | 0.18  | -1.26 | -0.78 | 0.47  | 0.02  | -1.14 | 0.31  | 0.27  | -0.23 | 0.29  | -0.03 | 0.22  |
| 1386547_at   | RGD1309285_pred   | XM_001081577.1:XM_221028.4    | dbcAMP forskolin PACAP38 | 1.42  | 1.92  | 2.22  | 1.89  | 1.28  | 1.80  | 1.84  | 1.21  | 1.01  | 0.16  | 0.26  | 0.12  | 0.73  | -0.52 | 1.20  | -0.10 | -0.50 | -0.94 |
| 1386558_at   | Irf6_predicted    | NM_001067431.1                | dbcAMP forskolin PACAP38 | 1.25  | 1.86  | 1.36  | 1.36  | 1.33  | 1.07  | 1.73  | 1.34  | 1.10  | 1.15  | 0.78  | 0.88  | 0.30  | -0.16 | 0.28  | 1.15  | 0.45  | 1.03  |
| 1386783_at   | RGD1560819_pred   | XM_001060886.1:XM_225912.3    | dbcAMP forskolin PACAP38 | 0.98  | 1.00  | 0.30  | 0.56  | 1.20  | 0.10  | 0.67  | 1.09  | 0.03  | 0.66  | 0.48  | 1.38  | -0.06 | -0.25 | 0.31  | 0.82  | 1.05  | 1.81  |
| 1386908_at   | Girx1             | NM_022278.1                   | dbcAMP forskolin PACAP38 | 0.46  | 0.81  | 1.82  | 1.30  | -0.01 | 1.02  | 1.70  | -0.03 | 1.05  | -0.18 | 0.08  | 1.97  | -0.05 | 0.26  | 0.99  | -0.15 | -0.23 | 0.58  |
| 1386917_at   | Pc                | NM_012744.2                   | dbcAMP forskolin PACAP38 | -0.03 | -1.55 | -1.25 | -0.17 | -1.48 | -1.22 | -0.05 | -1.18 | -0.84 | -0.35 | -1.60 | -1.30 | -0.15 | -0.50 | -0.56 | -0.35 | -1.12 | -0.08 |
| 1386935_at   | Nr4a1             | NM_024388.1                   | dbcAMP forskolin PACAP38 | 6.09  | 3.25  | 4.30  | 6.16  | 2.97  | 3.78  | 6.38  | 2.71  | 4.08  | 0.95  | -0.73 | 0.72  | 0.76  | -0.09 | 0.91  | 0.26  | -0.61 | 0.60  |
| 1386965_at   | Lpl               | NM_012598.1                   | dbcAMP forskolin PACAP38 | -0.03 |       |       |       |       |       |       |       |       |       |       |       |       |       |       |       |       |       |

|         |    |                    |                               |                          |       |       |       |       |       |       |       |       |       |       |       |       |       |       |       |       |         |       |
|---------|----|--------------------|-------------------------------|--------------------------|-------|-------|-------|-------|-------|-------|-------|-------|-------|-------|-------|-------|-------|-------|-------|-------|---------|-------|
| 1387788 | at | Junb               | NM_021836.2                   | dbcAMP forskolin PACAP38 | 0.43  | 1.08  | 1.07  | 0.12  | 1.10  | 1.04  | 0.48  | 1.24  | 1.02  | 0.93  | 0.76  | -0.12 | 0.64  | 0.43  | -0.04 | 2.20  | 1.54    | 0.75  |
| 1387803 | at | Pap2r2b            | NM_022209.2                   | dbcAMP forskolin PACAP38 | 0.23  | -2.23 | -0.47 | -0.41 | -2.05 | -1.10 | 0.03  | -2.49 | -0.95 | 0.01  | -0.08 | 0.63  | -0.13 | -0.29 | 0.38  | 0.57  | 0.59    | 0.76  |
| 1387895 | at | Fcgr1              | NM_033351.1                   | dbcAMP forskolin PACAP38 | 0.18  | 1.57  | 0.97  | 0.18  | 1.27  | 0.59  | 0.57  | 1.29  | 1.06  | -0.21 | -0.40 | 1.43  | -0.12 | -0.22 | 0.82  | -0.18 | -0.52   | 0.86  |
| 1387893 | at | C1s:RGD156175      | NM_138900.1:XR_007960.1       | dbcAMP forskolin PACAP38 | 2.22  | 0.33  | 2.84  | 2.58  | 0.18  | 3.16  | 2.68  | 0.26  | 1.89  | -0.24 | -0.06 | -0.01 | -0.24 | -0.07 | 0.00  | -0.22 | -0.04   | 0.00  |
| 1387999 | at | Slc18a1            | NM_013152.1                   | dbcAMP forskolin PACAP38 | 0.90  | -1.46 | -0.66 | 0.89  | -2.05 | -1.16 | 1.01  | -0.84 | -0.71 | 0.05  | 1.60  | 0.00  | -0.15 | 0.96  | 0.55  | -0.10 | -0.37   | 0.42  |
| 1388055 | at | Cyp4f5             | NM_173124.1                   | dbcAMP forskolin PACAP38 | 3.04  | 2.20  | 2.59  | 2.50  | 2.24  | 2.08  | 2.91  | 1.86  | 1.85  | 0.44  | 0.08  | 0.31  | 0.22  | -0.07 | 0.20  | 1.19  | 0.87    | 0.33  |
| 1388108 | at | Elovl6             | NM_134383.1                   | dbcAMP forskolin PACAP38 | 1.42  | 1.05  | 0.67  | 2.01  | 0.81  | 0.80  | 1.96  | 0.61  | 0.56  | 0.53  | 0.24  | 0.58  | 0.09  | -0.02 | 0.23  | 0.65  | -0.09   | -0.03 |
| 1388191 | at | Chrm4              | XM_001078223.1+XM_345403.3    | dbcAMP forskolin PACAP38 | 1.47  | 0.99  | 1.70  | 1.87  | 0.12  | 1.60  | 1.59  | 0.38  | 2.00  | -0.11 | -0.87 | 0.38  | 0.40  | -0.04 | 0.32  | 0.06  | 0.02    | 0.07  |
| 1388233 | at | Cish               | XM_001074104.1+XM_343472.3    | dbcAMP forskolin PACAP38 | 0.08  | 1.32  | 1.18  | 1.00  | 1.29  | 1.70  | 1.86  | 1.33  | 1.50  | 0.84  | 0.29  | -0.11 | 0.39  | -0.04 | -0.30 | 1.13  | 0.99    | 0.43  |
| 1388276 | at | Hist1h4a_predicted | XM_001071516.1                | dbcAMP forskolin PACAP38 | -0.23 | -1.37 | -1.19 | -0.39 | -2.01 | -1.30 | -0.38 | -1.11 | -0.96 | 0.20  | -0.70 | -0.58 | 0.04  | -0.22 | -0.05 | 0.18  | -0.65   | 0.08  |
| 1388395 | at | G0s2               | NM_001009632.1                | dbcAMP forskolin PACAP38 | 0.02  | -3.50 | -4.24 | -0.17 | -3.60 | -4.49 | 0.20  | -3.35 | -2.63 | -0.36 | -3.29 | -2.92 | -0.24 | -0.70 | -1.80 | -0.48 | -3.47   | -0.97 |
| 1388451 | at |                    |                               | dbcAMP forskolin PACAP38 | -0.08 | -1.66 | -0.73 | -0.16 | -1.49 | -0.86 | -0.02 | -1.37 | -0.75 | -0.18 | -0.78 | -0.02 | -0.03 | -0.04 | 0.15  | -0.20 | -0.97   | -0.61 |
| 1388525 | at | RGD1311203         | NM_001071453.1                | dbcAMP forskolin PACAP38 | -2.33 | -1.96 | -1.24 | -3.83 | -1.26 | -1.47 | -3.52 | -1.29 | -1.52 | -2.64 | -1.30 | 0.03  | -0.72 | -0.55 | -0.29 | -2.77 | -0.81   | -0.16 |
| 1388539 | at | Pkp2               | NM_001065241.1:XM_213560.4    | dbcAMP forskolin PACAP38 | 2.76  | 0.19  | 1.12  | 3.56  | 0.34  | 1.10  | 3.77  | 0.24  | 1.31  | 1.01  | 0.42  | 0.21  | 0.13  | 0.03  | 0.24  | 0.85  | -0.20   | -0.23 |
| 1388587 | at | ter3               | NM_212505.1                   | dbcAMP forskolin PACAP38 | 2.53  | 2.43  | 2.06  | 2.64  | 2.14  | 2.09  | 3.30  | 2.18  | 2.20  | 1.14  | 1.25  | 0.49  | 0.79  | 0.60  | 0.23  | 1.88  | 1.18    | 1.19  |
| 1388811 | at |                    |                               | dbcAMP forskolin PACAP38 | 0.03  | 1.14  | 0.83  | -0.26 | 1.00  | 0.54  | -0.24 | 1.16  | 0.67  | -0.48 | 1.38  | 1.92  | -0.12 | 0.86  | 1.20  | -0.41 | 0.49    | 0.35  |
| 1388932 | at | Lama5              | XM_001060527.1+XM_215963.4    | dbcAMP forskolin PACAP38 | 1.73  | 0.60  | 0.72  | 2.27  | 0.49  | 0.86  | 2.33  | 0.56  | 0.91  | 0.35  | 0.13  | -0.54 | 0.00  | 0.07  | -0.29 | 0.50  | 0.04    | 0.46  |
| 1388978 | at |                    |                               | dbcAMP forskolin PACAP38 | 0.66  | 1.55  | 1.15  | 0.84  | 1.37  | 1.02  | 0.89  | 1.11  | 0.79  | 0.10  | 0.51  | 0.35  | 0.08  | 0.17  | 0.23  | 0.15  | 0.27    | 0.34  |
| 1389084 | at |                    |                               | dbcAMP forskolin PACAP38 | -1.54 | -0.54 | -1.23 | -1.89 | -0.18 | -1.05 | -1.19 | -0.09 | -0.88 | -0.91 | -0.95 | -0.05 | -0.15 | -0.29 | -0.34 | -1.17 | -0.90   | -0.09 |
| 1389137 | at |                    |                               | dbcAMP forskolin PACAP38 | -1.02 | -0.31 | -0.15 | -1.38 | -0.22 | -0.27 | -1.31 | -0.48 | -0.37 | -0.50 | -0.60 | -0.52 | -0.30 | -0.07 | -0.28 | -0.45 | -0.45   | -0.59 |
| 1389157 | at | Cdc42ep1_predicted | NM_001079700.1                | dbcAMP forskolin PACAP38 | -1.09 | 0.22  | -0.04 | -1.13 | -0.29 | -0.57 | -1.14 | -0.21 | -0.33 | -0.07 | -0.58 | -0.05 | 0.11  | -0.20 | -0.10 | -0.30 | -0.26   | 0.36  |
| 1389186 | at |                    |                               | dbcAMP forskolin PACAP38 | 1.41  | 0.71  | 0.87  | 2.01  | 0.62  | 0.94  | 2.19  | 0.56  | 0.94  | -0.15 | 0.26  | 0.22  | -0.01 | 0.26  | 0.17  | -0.25 | -0.65   | -0.35 |
| 1389194 | at |                    |                               | dbcAMP forskolin PACAP38 | 2.57  | 1.20  | 1.27  | 2.59  | 1.48  | 1.37  | 2.57  | 1.40  | 1.31  | -0.26 | -0.64 | -0.65 | 0.08  | -0.47 | -0.28 | -0.72 | -0.66   | 0.08  |
| 1389231 | at | RGD1564957_pred    | XM_001058167.1+XM_233240.4    | dbcAMP forskolin PACAP38 | 1.29  | 1.96  | 1.42  | 1.44  | 2.19  | 1.49  | 1.81  | 1.88  | 1.26  | -0.22 | 0.47  | 1.33  | -0.32 | -0.42 | 0.55  | 0.40  | 0.27    | 0.90  |
| 1389265 | at | Gbe1               | XM_001064453.1:XM_221747.4    | dbcAMP forskolin PACAP38 | 0.20  | -1.49 | -1.52 | -0.10 | -1.29 | -1.44 | 0.10  | -0.92 | -1.31 | 0.00  | -0.86 | -1.16 | -0.12 | -0.54 | -0.66 | -0.07 | -0.28   | 0.96  |
| 1389356 | at |                    |                               | dbcAMP forskolin PACAP38 | -0.60 | -1.36 | -1.68 | -1.15 | -0.82 | -1.38 | -0.87 | -0.99 | -1.40 | -0.98 | -1.20 | -0.92 | -0.46 | -0.64 | -0.64 | -1.61 | -0.58   | -0.59 |
| 1389373 | at | Smad1              | NM_013130.2                   | dbcAMP forskolin PACAP38 | 1.72  | 1.95  | 1.36  | 1.15  | 1.18  | 1.36  | 1.30  | 0.24  | 1.16  | 0.00  | -0.03 | 0.15  | 0.10  | 0.04  | 0.01  | 0.72  | 0.66    | 0.70  |
| 1389396 | at |                    |                               | dbcAMP forskolin PACAP38 | 0.09  | 1.21  | 1.41  | 1.84  | 1.22  | 1.54  | 1.90  | 0.78  | 1.44  | -0.77 | 0.00  | 0.40  | -0.03 | -0.16 | 0.14  | -0.79 | 0.00    | 0.48  |
| 1389406 | at |                    |                               | dbcAMP forskolin PACAP38 | 0.14  | 1.08  | 0.55  | -0.15 | 1.18  | 0.65  | -0.04 | 1.15  | 0.50  | -0.04 | 0.62  | 0.48  | -0.04 | 0.16  | 0.08  | 0.03  | 0.47    | 0.18  |
| 1389409 | at | LOC500040          | NM_001039344.2                | dbcAMP forskolin PACAP38 | 0.98  | 1.17  | 0.97  | 1.35  | 0.76  | 0.88  | 1.64  | 0.89  | 1.08  | 0.40  | 1.14  | 1.20  | 0.03  | 0.27  | 0.35  | 0.73  | 1.05    | 0.63  |
| 1389426 | at | Ccdc92             | NM_001083898.1                | dbcAMP forskolin PACAP38 | 1.58  | 0.74  | 0.76  | 1.80  | 0.78  | 0.99  | 1.84  | 0.69  | 0.81  | 0.07  | 0.48  | 0.41  | 0.11  | 0.26  | 0.20  | 0.03  | 0.30    | 0.42  |
| 1389448 | at | Sept4              | NM_001011893.1:XM_001081164.1 | dbcAMP forskolin PACAP38 | 0.44  | -1.20 | 0.71  | -0.41 | -1.26 | -1.11 | -0.21 | -1.21 | -0.49 | -0.33 | -1.20 | 0.19  | -0.40 | -0.51 | 0.81  | -0.20 | -1.34   | 0.08  |
| 1389466 | at |                    |                               | dbcAMP forskolin PACAP38 | 1.12  | 0.30  | 0.58  | 1.57  | 0.30  | 0.69  | 1.76  | 0.16  | 0.60  | 0.09  | 0.10  | 0.07  | -0.08 | -0.17 | 0.22  | 0.05  | 0.08    | 0.08  |
| 1389489 | at |                    |                               | dbcAMP forskolin PACAP38 | -0.15 | -0.94 | -1.04 | -0.72 | -1.23 | -0.95 | -0.41 | -1.23 | -0.84 | 0.48  | -0.25 | -0.27 | 0.17  | -0.20 | -0.11 | 0.47  | -0.67   | -0.45 |
| 1389500 | at | LOC678766          | XM_001053087.1                | dbcAMP forskolin PACAP38 | 1.95  | 0.66  | 1.17  | 1.97  | 1.05  | 1.33  | 1.92  | 0.58  | 0.96  | -0.09 | -0.04 | 0.22  | 0.01  | -0.39 | -0.05 | 0.11  | -0.01   | 0.42  |
| 1389538 | at | Ntkbia             | XM_001075778.1+XM_343065.3    | dbcAMP forskolin PACAP38 | -1.09 | 0.97  | 0.73  | -1.22 | 1.03  | 0.91  | -0.72 | 1.10  | 0.97  | -0.15 | 0.00  | -0.29 | -0.01 | 0.33  | 0.23  | -0.58 | 0.68    | -0.45 |
| 1389680 | at | Eil2               | XM_001054852.1                | dbcAMP forskolin PACAP38 | 1.72  | 0.39  | 0.91  | 2.22  | 0.14  | 0.07  | 3.09  | 0.36  | 0.98  | 0.55  | 0.69  | 0.64  | 0.24  | 0.28  | 0.56  | 0.70  | 0.06    | 0.28  |
| 1389706 | at |                    |                               | dbcAMP forskolin PACAP38 | 0.39  | 1.88  | 1.32  | 0.50  | 1.79  | 1.24  | 0.71  | 1.64  | 0.44  | -0.10 | 0.52  | 1.11  | -0.13 | -0.17 | 0.24  | 0.03  | 0.07    | 0.32  |
| 1389712 | at | Ebf3_predicted     | XM_001056705.1+XM_341951.3    | dbcAMP forskolin PACAP38 | 2.42  | -1.62 | -1.45 | 2.70  | -1.53 | -0.57 | 2.54  | -2.38 | -0.62 | -0.70 | 0.13  | 0.73  | 0.10  | 0.03  | 0.87  | -1.61 | -0.24   | -0.98 |
| 1389754 | at |                    |                               | dbcAMP forskolin PACAP38 | 3.58  | 4.94  | 3.98  | 5.75  | 3.69  | 3.98  | 6.10  | 0.15  | 2.18  | -0.03 | -0.08 | 0.00  | 0.03  | 0.08  | 0.00  | -0.03 | 0.69    | 0.00  |
| 1389874 | at | LOC498425          | NM_001017504.1                | dbcAMP forskolin PACAP38 | 1.88  | 0.43  | 1.05  | 1.84  | 0.54  | 1.17  | 2.05  | 0.36  | 0.74  | -0.18 | -0.06 | 0.06  | -0.28 | -0.12 | 0.75  | -0.26 | -0.53   | 0.71  |
| 1389889 | at | RGD1306404_pred    | XM_001056833.1:XM_216063.4    | dbcAMP forskolin PACAP38 | 0.94  | 1.44  | 0.50  | 0.87  | 1.15  | 0.76  | 0.96  | 1.30  | 0.54  | 0.77  | 0.36  | 0.10  | 0.51  | 0.06  | 0.23  | 0.75  | -0.20   | -0.12 |
| 1389894 | at | LOC681740          | XM_001056690.1:XM_001056762.1 | dbcAMP forskolin PACAP38 | 1.22  | 0.63  | 0.51  | 1.74  | 0.39  | 0.61  | 2.06  | 0.26  | 0.31  | 1.09  | 1.34  | 0.67  | -0.05 | 0.30  | 0.13  | 1.31  | 0.43    | 0.06  |
| 1389999 | at |                    |                               | dbcAMP forskolin PACAP38 | -1.26 | -0.14 | -0.99 | -1.23 | -0.39 | -0.87 | -1.38 | -0.27 | -0.84 | -1.56 | -0.25 | -0.08 | -0.83 | -0.21 | -0.87 | -1.60 | -0.60   | -1.03 |
| 1390021 | at | Hist1h2bh          | XM_001054570.1+XM_001071676.1 | dbcAMP forskolin PACAP38 | -0.17 | -1.89 | -0.43 | -0.34 | -1.56 | -0.16 | -0.17 | -1.08 | 0.24  | 0.22  | -0.55 | 0.25  | 0.29  | 0.05  | 0.44  | 0.10  | -0.52   | 0.35  |
| 1390117 | at |                    |                               | dbcAMP forskolin PACAP38 | -2.51 | -0.46 | -0.14 | -2.94 | -0.53 | -0.51 | -2.68 | -0.45 | -0.64 | -1.86 | -1.27 | 0.08  | -0.26 | -0.25 | -0.09 | -2.69 | -0.85   | 0.17  |
| 1390127 | at | Dixdc1             | NM_001037654.1                | dbcAMP forskolin PACAP38 | -0.77 | -1.79 | -1.49 | -1.31 | -1.40 | -1.74 | -1.32 | -1.39 | -1.17 | -1.09 | -0.96 | -0.58 | -0.29 | -0.38 | -0.29 | -1.21 | -0.71   | 0.33  |
| 1390134 | at |                    |                               | dbcAMP forskolin PACAP38 | 1.40  | 0.84  | 1.33  | 1.51  | 0.86  | 1.15  | 1.45  | 0.73  | 1.07  | -0.10 | -0.08 | 0.23  | 0.24  | 0.08  | 0.21  | -0.11 | 0.10    | 0.38  |
| 1390153 | at |                    |                               | dbcAMP forskolin PACAP38 | 0.22  | 1.75  | 1.33  | 0.52  | 1.65  | 1.20  | 0.62  | 1.38  | 1.13  | 0.06  | 0.94  | 1.44  | -0.14 | 0.25  | 0.68  | 1.11  | 1.04    | 1.77  |
| 1390173 | at |                    |                               | dbcAMP forskolin PACAP38 | -1.04 | -0.22 | -0.21 | -1.75 | -0.22 | -0.46 | -1.49 | -0.15 | -0.36 | 0.39  | -0.34 | -0.14 | -0.13 | 0.03  | -0.07 | 0.47  | -0.23   | 0.14  |
| 1390271 | at | Plekha6_predicted  | XM_001080716.1:XM_341118.3    | dbcAMP forskolin PACAP38 | -1.39 | -0.17 | -0.71 | -2.05 | -0.50 | -1.02 | -1.74 | -0.09 | -0.49 | -0.64 | 0.69  | 0.00  | -0.05 | 0.53  | -0.31 | -0.51 | 0.44    | -0.65 |
| 1390274 | at | Ptxna2_predicted   | XM_001070296.1:XM_223080.4    | dbcAMP forskolin PACAP38 | -1.42 | -0.65 | 0.16  | 2.19  | -0.79 | 0.15  | 2.35  | -0.79 | 0.38  | 0.14  | 0.41  | 0.19  | -0.05 | -0.15 | -0.43 | -0.29 | -0.34   | -0.01 |
| 1390307 | at |                    |                               | dbcAMP forskolin PACAP38 | -1.68 | -0.79 | -0.64 | -1.44 | -0.56 | 0.89  | -1.46 | -0.96 | -1.43 | 0.26  | 0.30  | -0.49 | -0.12 | 0.48  | -0.83 | 1.08  | 1.52    | 0.22  |
| 1390452 | at |                    |                               | dbcAMP forskolin PACAP38 | -1.22 | -0.51 | -0.69 | -1.55 | -0.22 | -1.20 | -1.00 | -0.20 | -0.94 | -0.24 | -0.06 | 0.31  | -0.52 | -0.12 | 0.27  | -0.50 | -0.18   | 0.40  |
| 1390458 | at |                    |                               | dbcAMP forskolin PACAP38 | 1.55  | 0.30  | -0.14 | 2.34  | 0.59  | 0.02  | 2.39  | 0.57  | 0.18  | 1.66  | -0.14 | -0.31 | 0.30  | 0.02  | 0.20  | 1.76  | 0.01    | 0.05  |
| 1390536 | at |                    |                               | dbcAMP forskolin PACAP38 | -0.47 | -2.57 | -1.93 | -0.91 | -2.11 | -1.77 | -0.80 | -1.57 | -1.12 | -0.47 | -1.41 | -1.03 | 0.15  | -0.08 | -0.36 | -1.20 | -1.60</ |       |











## Supplementary Figure 3

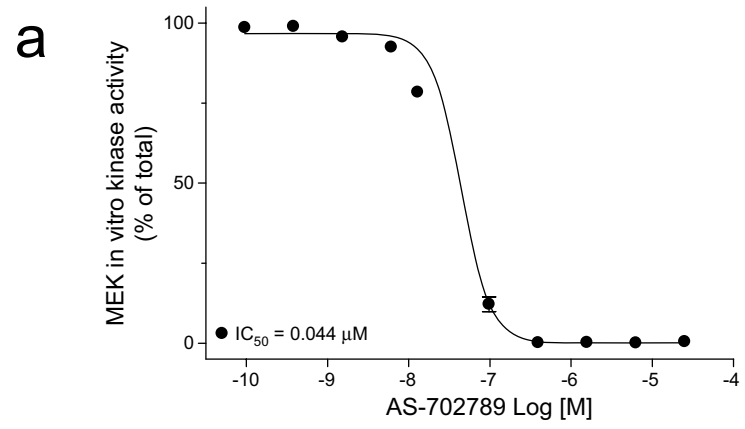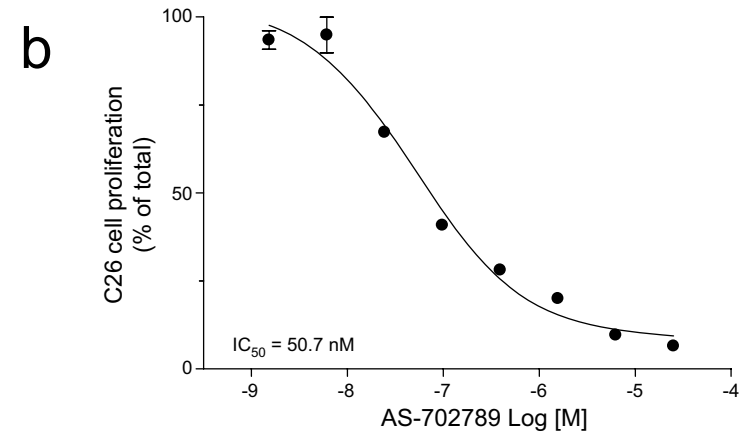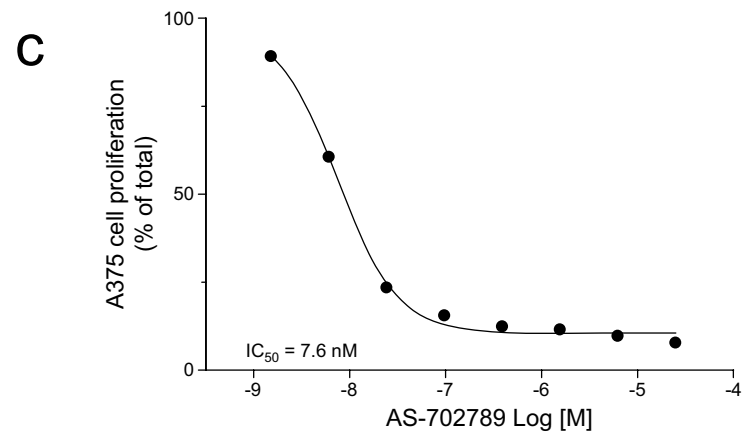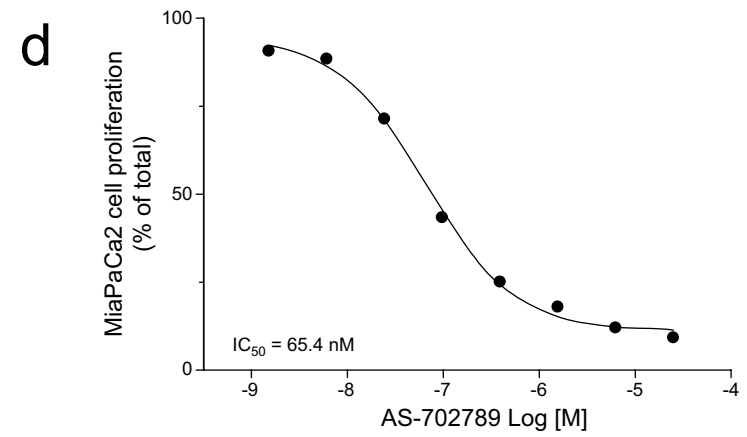

Supplement: supp_M109.009324_jbc.M109.009324-1.pdf [file supp_M109.009324_jbc.M109.009324-1.pdf]
